# Supplementary material for: Subunit exchange among endolysosomal tethering complexes is linked to contact site formation at the vacuole
Source: PubMed Central journal article supplement — Mol Biol Cell. 2021 Dec 1;32(22):br14. doi: 10.1091/mbc.E21-05-0227 (PMC8694092; doi:10.1091/mbc.e21-05-0227), 2021-12-01
Supplement: mbc-32-br14-s001.pdf [file mbc-32-br14-s001.pdf]

# Supplemental Materials

Molecular Biology of the Cell

González Montoro *et al.*

Table S1. Yeast strains used in this study

| Strain    | Genotype                                                                                                                                                                                                                                                                       | Source                          |
|-----------|--------------------------------------------------------------------------------------------------------------------------------------------------------------------------------------------------------------------------------------------------------------------------------|---------------------------------|
| SEY6210   | MATalpha <i>leu2-3,112 ura3-52 his3-Δ200 trp-Δ901 lys2-801 suc2-Δ9 GAL</i>                                                                                                                                                                                                     | Reggiori Lab                    |
| BY4741    | MATa <i>his3Δ1 leu2Δ0 met15Δ0 ura3Δ0</i>                                                                                                                                                                                                                                       | Euroscarf library               |
| BY4727    | MATalpha <i>his3Δ200 leu2Δ0 lys2Δ0 met15Δ0 trp1Δ63 ura3Δ0</i>                                                                                                                                                                                                                  | Euroscarf library               |
| CUY 1915  | MATa <i>his3Δ1 leu2Δ0 met15Δ0 ura3Δ0 VPS3::KANMX-GAL1pr</i>                                                                                                                                                                                                                    | (Peplowska et al., 2007)        |
| CUY 4596  | MATalpha <i>leu2-3,112 ura3-52 his3-Δ200 trp-Δ901 lys2-801 suc2-Δ9 GAL VAM6Δ::natNT2</i>                                                                                                                                                                                       | (González-Montoro et al., 2018) |
| CUY 10819 | MATalpha <i>leu2-3,112 ura3-52 his3-Δ200 trp-Δ901 lys2-801 suc2-Δ9 GAL VAM6Δ::natNT2 URA3::pRS406 VPS39pr-VPS39(S246D, S247D, S249D, S250D, E526A, E528A, E529A, E532A, I508A, L511A, V512A, L513A)-VPS39ter</i>                                                               | (González-Montoro et al., 2018) |
| CUY 11493 | MATalpha <i>leu2-3,112 ura3-52 his3-Δ200 trp-Δ901 lys2-801 suc2-Δ9 GAL VAM6Δ::natNT2 URA3::pRS406 VPS39pr-VPS39(S246D, S247D, S249D, S250D, E526A, E528A, E529A, E532A, I508A, L511A, V512A, L513A)-VPS39ter ZRC1::mGFP-hphNT1 SHM1::3xmCherry-HIS</i>                         | This study                      |
| CUY 11494 | MATalpha <i>leu2-3,112 ura3-52 his3-Δ200 trp-Δ901 lys2-801 suc2-Δ9 GAL VAM6Δ::natNT2 URA3::pRS406 VPS39pr-VPS39(S246D, S247D, S249D, S250D, E526A, E528A, E529A, E532A, I508A, L511A, V512A, L513A)-VPS39ter YVC1::mGFP-hphNT1 SHM1::3xmCherry-HIS</i>                         | This study                      |
| CUY 11495 | MATalpha <i>leu2-3,112 ura3-52 his3-Δ200 trp-Δ901 lys2-801 suc2-Δ9 GAL VAM6Δ::natNT2 URA3::pRS406 VPS39pr-VPS39(S246D, S247D, S249D, S250D, E526A, E528A, E529A, E532A, I508A, L511A, V512A, L513A)-VPS39ter PFA3::mGFP-hphNT1 SHM1::3xmCherry-HIS</i>                         | This study                      |
| CUY 11499 | MATalpha <i>leu2-3,112 ura3-52 his3-Δ200 trp-Δ901 lys2-801 suc2-Δ9 GAL VAM6Δ::natNT2 URA3::pRS406 VPS39pr-VPS39(S246D, S247D, S249D, S250D, E526A, E528A, E529A, E532A, I508A, L511A, V512A, L513A)-VPS39ter ZRC1::mGFP-hphNT1 TOM70::Chromobody-kanMX SHM1::3xmCherry-HIS</i> | This study                      |
| CUY 11500 | MATalpha <i>leu2-3,112 ura3-52 his3-Δ200 trp-Δ901 lys2-801 suc2-Δ9 GAL VAM6Δ::natNT2 URA3::pRS406 VPS39pr-VPS39(S246D, S247D, S249D, S250D, E526A, E528A, E529A, E532A, I508A, L511A, V512A, L513A)-VPS39ter YVC1::mGFP-hphNT1 TOM70::Chromobody-kanMX SHM1::3xmCherry-HIS</i> | This study                      |
| CUY 11501 | MATalpha <i>leu2-3,112 ura3-52 his3-Δ200 trp-Δ901 lys2-801 suc2-Δ9 GAL VAM6Δ::natNT2 URA3::pRS406 VPS39pr-VPS39(S246D, S247D, S249D, S250D, E526A, E528A, E529A, E532A, I508A, L511A, V512A, L513A)-VPS39ter PFA3::mGFP-hphNT1 TOM70::Chromobody-kanMX</i>                     | This study                      |

|           |                                                                                                                                            |                        |
|-----------|--------------------------------------------------------------------------------------------------------------------------------------------|------------------------|
|           | <i>SHM1::3xmCherry-HIS</i>                                                                                                                 |                        |
| CUY 10495 | MATalpha <i>leu2-3,112 ura3-52 his3-Δ200 trp-Δ901 lys2-801 suc2-Δ9 GAL VAM6Δ::natNT2 URA3::pRS406 TEFpr-GFP-VPS39 LEU2::pYX142-MtRFP</i>   | This study             |
| CUY 10121 | MATalpha <i>leu2-3,112 ura3-52 his3-Δ200 trp-Δ901 lys2-801 suc2-Δ9 GAL VAM6Δ::natNT2 URA3::pRS406 TEFpr-VPS39-GFP LEU2::pYX142-MtRFP</i>   | This study             |
| CUY 10411 | MATalpha <i>leu2-3,112 ura3-52 his3-Δ200 trp-Δ901 lys2-801 suc2-Δ9 GAL VAM6Δ::natNT2 URA3::pRS406 TEFpr-GFP-VPS39</i>                      | This study             |
| CUY 587   | MATalpha <i>leu2-3,112 ura3-52 his3-Δ200 trp-Δ901 lys2-801 suc2-Δ9 GAL VAM6Δ::natNT2 URA3::pRS406 TEFpr-GFP-VPS39 VPS11pr::KanMX-TEFpr</i> | This study             |
| CUY 11860 | MATalpha <i>leu2-3,112 ura3-52 his3-Δ200 trp-Δ901 lys2-801 suc2-Δ9 GAL VPS11:: natNT2-TEFpr</i>                                            | This study             |
| CUY 12389 | MATalpha <i>leu2-3,112 ura3-52 his3-Δ200 trp-Δ901 lys2-801 suc2-Δ9 GAL VPS41::mNeon-KANMX VPS39::2x5xGAmKate2-hphNT1</i>                   | This study             |
| CUY 12390 | MATalpha <i>leu2-3,112 ura3-52 his3-Δ200 trp-Δ901 lys2-801 suc2-Δ9 GAL VPS39::mNeon-KANMX VPS41::2x5xGAmKate2-hphNT1</i>                   | This study             |
| CUY 12432 | MATalpha <i>leu2-3,112 ura3-52 his3-Δ200 trp-Δ901 lys2-801 suc2-Δ9 GAL VPS41::mNeon-KANMX VPS3::2x5xGAmKate2-hphNT1</i>                    | This study             |
| CUY 11838 | MATalpha <i>leu2-3,112 ura3-52 his3-Δ200 trp-Δ901 lys2-801 suc2-Δ9 GAL VPS41::GFP-hphNT1 VPS3::6xHA-natNT2</i>                             | This study             |
| CUY 11857 | MATalpha <i>leu2-3,112 ura3-52 his3-Δ200 trp-Δ901 lys2-801 suc2-Δ9 GAL VPS41::GFP-hphNT1 VPS3::6xHA-natNT2 VPS39Δ::KanMX</i>               | This study             |
| CUY 11858 | MATalpha <i>leu2-3,112 ura3-52 his3-Δ200 trp-Δ901 lys2-801 suc2-Δ9 GAL VPS41::GFP-hphNT1 VPS3::6xHA-natNT2 VPS39::KanMX-TEFpr</i>          | This study             |
| CUY 10831 | MATalpha <i>his3Δ200 leu2Δ0 lys2Δ0 met15Δ0 trp1Δ63 ura3Δ0 VPS3::mGFP-hphNT1</i>                                                            | This study             |
| CUY 4824  | MATalpha <i>leu2-3,112 ura3-52 his3-Δ200 trp-Δ901 lys2-801 suc2-Δ9 GAL VAM6::natNT2-TEFpr-GFP</i>                                          | Hönscher et al., 2014. |
| CUY 5096  | MATalpha <i>leu2-3,112 ura3-52 his3-Δ200 trp-Δ901 lys2-801 suc2-Δ9 GAL vam2::KanMX VAM6::natNT2-TEFpr-GFP</i>                              | Ungermann Lab          |
| CUY 13308 | MATalpha <i>leu2-3,112 ura3-52 his3-Δ200 trp-Δ901 lys2-801 suc2-Δ9 GAL VAM6::natNT2-TEFpr-GFP VPS11Δ::KanMX</i>                            | This study             |

**Table S2 - Identified proteins in the Vps3-GFP Pull down**

| <b>Protein IDs</b>   | <b>Gene names</b> | <b>Peptides</b> | <b>Unique peptides</b> | <b>Sequence coverage [%]</b> | <b>Ratio H/L normalized</b> | <b>Intensity</b> |
|----------------------|-------------------|-----------------|------------------------|------------------------------|-----------------------------|------------------|
| P23643               | VPS3              | 29              | 29                     | 31.7                         | 192.87                      | 1994700000       |
| P27801;Q12171        | PEP3 (VPS18)      | 27              | 27                     | 37.5                         | 30.468                      | 1127600000       |
| P12868               | PEP5 (VPS11)      | 19              | 19                     | 23.1                         | 24.234                      | 962740000        |
| P39702               | VPS8              | 7               | 7                      | 8.6                          | 23.858                      | 27576000         |
| P20795               | VPS33             | 11              | 11                     | 17.2                         | 10.131                      | 193370000        |
| P38959               | VPS41             | 6               | 6                      | 8.5                          | 5.5815                      | 122190000        |
| P40341               | YTA12             | 1               | 1                      | 1.1                          | 5.4305                      | 14201000         |
| Q03308;REV__P11075   | VPS16             | 9               | 9                      | 15                           | 5.3809                      | 126840000        |
| Q3E764               | TMA7              | 2               | 2                      | 21.9                         | 3.7498                      | 108740000        |
| P36017               | VPS21             | 2               | 2                      | 11.9                         | 2.4173                      | 71488000         |
| Q01896;Q12691;P13587 | ENA2;ENA5;ENA1    | 6               | 6                      | 8.8                          | 2.2143                      | 82202000         |
| P05030;P19657        | PMA1;PMA2         | 13              | 13                     | 18.7                         | 2.1101                      | 6889300000       |
| P53313               | SDA1              | 3               | 2                      | 3.8                          | 2.0881                      | 5266200          |
| P38256               | YBR096W           | 2               | 2                      | 8.3                          | 1.9662                      | 27161000         |
| Q03516               | RSN1              | 4               | 4                      | 7                            | 1.9226                      | 34247000         |
| P34167               | TIF3              | 4               | 4                      | 13.3                         | 1.828                       | 75006000         |
| Q12000               | TMA46             | 3               | 3                      | 7                            | 1.8118                      | 18435000         |
| P40056               | GET2              | 3               | 3                      | 23.2                         | 1.7862                      | 55326000         |
| Q12452               | ERG27             | 2               | 2                      | 5.2                          | 1.7599                      | 26950000         |
| O14467               | MBF1              | 2               | 2                      | 23.8                         | 1.727                       | 193980000        |
| P53903               | PGA2              | 3               | 3                      | 33.3                         | 1.7026                      | 67132000         |
| Q04225               | RRB1              | 6               | 6                      | 15.9                         | 1.6922                      | 85802000         |
| P23301;P19211        | HYP2              | 5               | 5                      | 37.6                         | 1.685                       | 242740000        |
| P00498               | HIS1              | 4               | 4                      | 11.8                         | 1.6798                      | 79926000         |
| P05374               | CHO2              | 5               | 5                      | 7.1                          | 1.6652                      | 32327000         |
| P40047               | ALD5              | 10              | 9                      | 21.9                         | 1.6479                      | 167960000        |
| P38720;P53319        | GND1              | 12              | 12                     | 32.7                         | 1.6233                      | 316940000        |
| P10614               | ERG11             | 4               | 4                      | 10.4                         | 1.6116                      | 25384000         |
| Q12029               | FSF1              | 3               | 3                      | 10.1                         | 1.5981                      | 12710000         |
| P32353               | ERG3              | 5               | 5                      | 17.8                         | 1.5882                      | 62673000         |
| P39937               | PAC2              | 2               | 2                      | 4.1                          | 1.5834                      | 113310000        |

|               |           |    |    |      |        |            |
|---------------|-----------|----|----|------|--------|------------|
| P37838        | NOP4      | 4  | 4  | 6.9  | 1.5761 | 58647000   |
| P32466        | HXT3      | 3  | 3  | 8.5  | 1.5664 | 22733000   |
| Q12109        | WRS1      | 5  | 5  | 15.7 | 1.5442 | 105550000  |
| P38063        | PRS4      | 5  | 4  | 19   | 1.5368 | 87974000   |
| P32583        | SRP40     | 2  | 2  | 4.7  | 1.5344 | 15640000   |
| P32911        | SUI1      | 2  | 2  | 29.6 | 1.5119 | 17262000   |
| P39106        | MNN1      | 3  | 3  | 3.4  | 1.5067 | 14810000   |
| P25340        | ERG4      | 2  | 2  | 4.4  | 1.4596 | 22391000   |
| P27476        | NSR1      | 4  | 4  | 12.6 | 1.4577 | 293590000  |
| P23615        | SPT6      | 6  | 6  | 5.3  | 1.4538 | 9526100    |
| P12683;P12684 | HMG1;HMG2 | 4  | 4  | 3.8  | 1.4383 | 26533000   |
| P38689        | PRS3      | 3  | 3  | 13.1 | 1.4335 | 35195000   |
| P40055        | UTP7      | 2  | 2  | 5.6  | 1.4334 | 13429000   |
| P33755        | NPL4      | 6  | 6  | 13.6 | 1.4267 | 24710000   |
| Q12271        | INP53     | 2  | 2  | 1.6  | 1.4204 | 5494100    |
| Q03862        | ARX1      | 6  | 6  | 19.4 | 1.4194 | 153210000  |
| P39727        | ERV46     | 2  | 2  | 6.3  | 1.4136 | 3129000    |
| P38620        | PRS2      | 3  | 2  | 13.2 | 1.4101 | 13923000   |
| P46989        | ATG27     | 2  | 2  | 11.1 | 1.4088 | 14037000   |
| Q07804        | YEH1      | 2  | 2  | 4.9  | 1.4037 | 7710800    |
| Q3E705        | EFG1      | 3  | 3  | 19.7 | 1.3999 | 17356000   |
| P53192        | GET1      | 3  | 3  | 12.8 | 1.3976 | 28339000   |
| Q04013        | YHM2      | 3  | 3  | 9.2  | 1.3861 | 24740000   |
| Q05543        | RTT103    | 8  | 8  | 23.5 | 1.3848 | 64402000   |
| P48589        | RPS12     | 5  | 5  | 48.3 | 1.3773 | 3785500000 |
| P53730        | ALG12     | 3  | 3  | 4.9  | 1.377  | 17022000   |
| P47122        | NPA3      | 2  | 2  | 5.7  | 1.3717 | 9094300    |
| P15705        | STI1      | 16 | 16 | 32.3 | 1.3689 | 624840000  |
| P21954;P53982 | IDP1      | 7  | 7  | 23.4 | 1.3674 | 63187000   |
| P14906        | SEC63     | 14 | 14 | 26.8 | 1.3645 | 152640000  |
| P46970        | NMD5      | 3  | 2  | 3.4  | 1.3638 | 24922000   |
| P48813        | GNP1      | 3  | 3  | 5.9  | 1.3538 | 55856000   |
| P43585        | VTC2      | 7  | 7  | 6.8  | 1.3465 | 50675000   |

|               |        |    |    |      |        |            |
|---------------|--------|----|----|------|--------|------------|
| Q08986        | SAM3   | 2  | 2  | 6.8  | 1.3453 | 22819000   |
| P36120        | DBP7   | 2  | 2  | 4.4  | 1.3416 | 5277800    |
| Q12176        | MAK21  | 6  | 6  | 6.9  | 1.335  | 26308000   |
| P00950        | GPM1   | 5  | 5  | 17   | 1.3255 | 590820000  |
| P47102        | GEA1   | 7  | 7  | 7.5  | 1.3174 | 140850000  |
| P10592        | SSA2   | 31 | 10 | 56.5 | 1.3159 | 8884600000 |
| P39526        | LAA1   | 3  | 3  | 1.7  | 1.3141 | 18514000   |
| P40069        | KAP123 | 20 | 20 | 21.9 | 1.3095 | 1437800000 |
| P25586        | KRR1   | 3  | 3  | 12   | 1.3088 | 23819000   |
| P45978        | SCD6   | 2  | 2  | 11.2 | 1.3054 | 7967300    |
| P28274;P38627 | URA7   | 12 | 12 | 27.1 | 1.3045 | 302270000  |
| P32660        | DNF1   | 2  | 2  | 1.8  | 1.3045 | 4696700    |
| Q06053        | DUS3   | 2  | 2  | 2.7  | 1.3028 | 13425000   |
| Q08208        | NOP12  | 5  | 5  | 12.2 | 1.3023 | 69542000   |
| P38112        | MAK5   | 5  | 5  | 7    | 1.3006 | 33777000   |
| P40319        | ELO3   | 4  | 4  | 13.3 | 1.3003 | 123500000  |
| P38264        | PHO88  | 10 | 10 | 61.7 | 1.2986 | 322800000  |
| Q06506        | RRP9   | 6  | 6  | 13.4 | 1.298  | 38754000   |
| P33754        | SEC66  | 6  | 6  | 27.7 | 1.2957 | 36252000   |
| P22213        | SLY1   | 4  | 4  | 6.6  | 1.2934 | 16510000   |
| P53927        | NOP15  | 3  | 3  | 16.8 | 1.2914 | 50315000   |
| P47083        | MPP10  | 10 | 10 | 21.2 | 1.2908 | 85533000   |
| Q08831        | VTS1   | 2  | 2  | 5    | 1.2886 | 15692000   |
| Q06440        | CRN1   | 6  | 6  | 13.1 | 1.2881 | 59728000   |
| P25491        | YDJ1   | 13 | 13 | 35   | 1.2868 | 919850000  |
| P06168        | ILV5   | 5  | 5  | 13.9 | 1.2851 | 63508000   |
| P33302;Q04182 | PDR5   | 11 | 11 | 11.8 | 1.2839 | 364060000  |
| Q04175        | SXM1   | 6  | 6  | 7.8  | 1.2804 | 66753000   |
| P40413        | CCT5   | 10 | 10 | 17.1 | 1.2753 | 306430000  |
| Q99216        | PNO1   | 2  | 2  | 7.3  | 1.2732 | 15884000   |
| P29704        | ERG9   | 5  | 5  | 11   | 1.2728 | 78293000   |
| P54783        | ALO1   | 2  | 2  | 4.6  | 1.2718 | 7169000    |
| Q07830        | GPI13  | 3  | 3  | 3    | 1.2694 | 11928000   |

|               |           |    |    |      |        |            |
|---------------|-----------|----|----|------|--------|------------|
| P16861        | PFK1      | 20 | 20 | 29.5 | 1.2691 | 1527400000 |
| Q06511        | RRP15     | 5  | 5  | 24   | 1.2656 | 67652000   |
| P13586        | PMR1      | 6  | 6  | 8.2  | 1.2655 | 73593000   |
| P39986        | SPF1      | 7  | 7  | 8.9  | 1.2655 | 91629000   |
| P15565        | TRM1      | 3  | 3  | 8.1  | 1.2618 | 18627000   |
| P38261        | EXO84     | 3  | 3  | 4.6  | 1.2618 | 31475000   |
| Q00955;P32874 | ACC1      | 35 | 35 | 19.5 | 1.2612 | 4551700000 |
| Q08687        | TMA16     | 3  | 3  | 17.4 | 1.2602 | 13369000   |
| P41543        | OST1      | 3  | 3  | 11.1 | 1.2595 | 40895000   |
| P32895        | PRS1      | 4  | 4  | 17.1 | 1.2587 | 115070000  |
| Q03281        | HEH2      | 3  | 3  | 5.4  | 1.2534 | 40830000   |
| P36081        | YKL077W   | 3  | 3  | 5.9  | 1.2524 | 9012200    |
| P47008        | SFH5      | 3  | 3  | 10.2 | 1.2521 | 7911000    |
| P08679        | CIT2      | 3  | 2  | 12.6 | 1.2511 | 25452000   |
| Q04651        | ERV41     | 4  | 4  | 15.6 | 1.2489 | 24661000   |
| Q07953        | SDO1      | 2  | 2  | 8.8  | 1.248  | 7210200    |
| P25045        | LCB1      | 6  | 6  | 15.8 | 1.2475 | 89722000   |
| Q02892        | NOG1      | 4  | 4  | 11.4 | 1.2454 | 66972000   |
| Q12746        | PGA3      | 4  | 4  | 17.3 | 1.2451 | 35730000   |
| P48234        | ENP2      | 2  | 2  | 3.1  | 1.2416 | 6876500    |
| P27809        | KRE2      | 3  | 3  | 8.1  | 1.2412 | 23091000   |
| P38069        | MNN2      | 3  | 3  | 6.2  | 1.2403 | 19221000   |
| Q08004        | BUD20     | 3  | 3  | 25.3 | 1.2391 | 17519000   |
| P47120        | LIA1      | 5  | 5  | 20   | 1.2374 | 35800000   |
| P32324        | EFT1      | 10 | 10 | 17.3 | 1.2369 | 166740000  |
| P34241        | URB1      | 4  | 4  | 3.2  | 1.2346 | 56566000   |
| Q3E7Z5        | YIL002W-A | 2  | 2  | 33.3 | 1.2333 | 57920000   |
| Q04947        | RTN1      | 11 | 11 | 48.1 | 1.2322 | 1768500000 |
| Q12154        | GET3      | 8  | 8  | 28.2 | 1.2318 | 265720000  |
| P33401        | PGM1      | 6  | 5  | 15.1 | 1.2316 | 101480000  |
| P07273        | DST1      | 5  | 5  | 15.9 | 1.2314 | 62438000   |
| P53877        | IPI3      | 6  | 6  | 15   | 1.2313 | 44138000   |
| P38993        | FET3      | 2  | 2  | 4.2  | 1.2298 | 35386000   |

|               |           |    |    |      |        |            |
|---------------|-----------|----|----|------|--------|------------|
| P32794        | AFG2      | 2  | 2  | 4    | 1.2294 | 9055300    |
| P39993        | GEA2      | 11 | 11 | 11   | 1.2288 | 86587000   |
| Q08746        | RRS1      | 4  | 4  | 33.5 | 1.2281 | 49092000   |
| Q12450;P39704 | ERP4;ERP2 | 2  | 2  | 7.2  | 1.2274 | 16331000   |
| Q04500        | UTP14     | 5  | 5  | 8.8  | 1.2263 | 28959000   |
| P38961        | RRP8      | 3  | 3  | 8.9  | 1.225  | 9494600    |
| P36057        | SRP102    | 1  | 1  | 7    | 1.2224 | 9909000    |
| P15108        | HSC82     | 28 | 7  | 42.4 | 1.2217 | 4607700000 |
| P03965        | CPA2      | 15 | 15 | 20.2 | 1.2208 | 165370000  |
| Q12265        | PRS5      | 2  | 2  | 9.7  | 1.219  | 49247000   |
| P47912        | FAA4      | 6  | 4  | 13   | 1.2178 | 83831000   |
| P16521;P53978 | YEF3      | 16 | 16 | 17.1 | 1.2176 | 1438700000 |
| Q06178;P53204 | NMA1;NMA2 | 2  | 2  | 8.7  | 1.2163 | 23845000   |
| P53691        | CPR6      | 6  | 6  | 14.6 | 1.2156 | 90085000   |
| P37898        | AAP1      | 7  | 5  | 10   | 1.214  | 93401000   |
| Q06218        | DBP9      | 3  | 3  | 4.9  | 1.212  | 18875000   |
| P10622        | RPP1B     | 1  | 1  | 15.1 | 1.2118 | 1155900000 |
| P53734        | DBP6      | 6  | 6  | 15.3 | 1.2113 | 34426000   |
| Q04177        | UTP5      | 5  | 5  | 17.1 | 1.2109 | 32283000   |
| P38988        | GGC1      | 2  | 2  | 6.7  | 1.2079 | 19050000   |
| P39076        | CCT2      | 13 | 13 | 28.7 | 1.2078 | 475630000  |
| P38130        | KTR3      | 2  | 2  | 4.2  | 1.2067 | 16276000   |
| P42842        | EMW1      | 2  | 2  | 2.4  | 1.2063 | 5372500    |
| P05319        | RPP2A     | 5  | 5  | 79.2 | 1.2059 | 4867700000 |
| Q12063        | NUS1      | 3  | 3  | 10.7 | 1.2058 | 25739000   |
| P47047        | MTR4      | 12 | 12 | 13.8 | 1.2039 | 95082000   |
| P12612        | TCP1      | 7  | 7  | 17.5 | 1.2038 | 234040000  |
| P25087        | ERG6      | 6  | 6  | 17   | 1.2016 | 132730000  |
| Q07844        | RIX7      | 11 | 11 | 15.7 | 1.2014 | 157800000  |
| P35844        | KES1      | 6  | 6  | 17.1 | 1.2012 | 63192000   |
| P38342        | TSC10     | 2  | 2  | 10.9 | 1.2004 | 14054000   |
| P16862        | PFK2      | 9  | 9  | 16   | 1.1982 | 692600000  |
| P39077        | CCT3      | 12 | 12 | 30.5 | 1.1976 | 317920000  |



|                          |               |    |    |      |        |            |
|--------------------------|---------------|----|----|------|--------|------------|
| P26783                   | RPS5          | 3  | 3  | 14.7 | 1.1928 | 834690000  |
| Q04693                   | RSE1          | 3  | 3  | 3.2  | 1.1921 | 12738000   |
| P53261                   | NOP7          | 6  | 6  | 14   | 1.1905 | 171850000  |
| P35194                   | UTP20         | 4  | 4  | 2.4  | 1.1845 | 6883800    |
| Q06406                   | LSM6          | 1  | 1  | 20.9 | 1.1841 | 12849000   |
| P53276                   | UTP8          | 6  | 6  | 13.9 | 1.1834 | 42472000   |
| P53336                   | YGR283C       | 2  | 2  | 7.9  | 1.1833 | 7206900    |
| Q08760                   | RAX1          | 2  | 2  | 5.3  | 1.1819 | 9059600    |
| P47084                   |               | 3  | 3  | 6.6  | 1.1812 | 14928000   |
| P32319;REV__P47061;P5375 | PEP1          | 6  | 6  | 5.1  | 1.1802 | 40281000   |
| Q05942                   | RSA3          | 2  | 2  | 10.9 | 1.1797 | 33539000   |
| P27514                   | PHO91         | 7  | 7  | 10.1 | 1.1778 | 112150000  |
| Q04697                   | GSF2          | 8  | 8  | 25.3 | 1.1762 | 172300000  |
| P07342                   | ILV2          | 4  | 4  | 8.6  | 1.176  | 38242000   |
| P38755                   | OSH7          | 3  | 3  | 10.8 | 1.1755 | 4916700    |
| Q06338                   | BCP1          | 4  | 4  | 18.7 | 1.1746 | 29649000   |
| P40008                   | FMP52         | 2  | 2  | 10.8 | 1.1737 | 10714000   |
| Q03305                   | RMT2          | 3  | 3  | 11.2 | 1.1719 | 104900000  |
| P41895                   | TFG1          | 3  | 3  | 4.6  | 1.1706 | 7681900    |
| P30771                   | NAM7          | 4  | 4  | 6.1  | 1.1704 | 25672000   |
| Q3E757;POCOW9            | RPL11B;RPL11A | 7  | 7  | 42   | 1.1703 | 2146600000 |
| Q01855                   | RPS15         | 1  | 1  | 7.7  | 1.1702 | 1078000000 |
| P38144                   | ISW1          | 4  | 4  | 3.7  | 1.1685 | 17876000   |
| P39931                   | SSP120        | 3  | 3  | 9.8  | 1.1684 | 100390000  |
| P43555                   | EMP47         | 7  | 7  | 20.9 | 1.1679 | 98479000   |
| Q05040                   | FAR8          | 2  | 2  | 4.2  | 1.1676 | 20505000   |
| P47079                   | CCT8          | 15 | 15 | 42.3 | 1.1648 | 388890000  |
| P33892                   | GCN1          | 36 | 36 | 16.9 | 1.1633 | 1477300000 |
| P09950                   | HEM1          | 3  | 3  | 9.9  | 1.1613 | 6727800    |
| Q08818                   | MSC6          | 2  | 2  | 4.3  | 1.1611 | 5253200    |
| P32471                   | EFB1          | 9  | 9  | 64.6 | 1.1597 | 878370000  |
| P53859                   | CSL4          | 2  | 2  | 8.2  | 1.1596 | 13576000   |
| P07258                   | CPA1          | 2  | 2  | 5.4  | 1.1595 | 13787000   |

|        |        |    |    |      |        |            |
|--------|--------|----|----|------|--------|------------|
| P38801 | LRP1   | 3  | 3  | 17.4 | 1.1578 | 10297000   |
| P39685 | POM152 | 5  | 5  | 5.2  | 1.1577 | 21103000   |
| P38217 | KAP104 | 3  | 3  | 3.3  | 1.1576 | 25711000   |
| P16474 | KAR2   | 26 | 25 | 40.2 | 1.1569 | 1332200000 |
| P39007 | STT3   | 2  | 2  | 2.1  | 1.1554 | 11021000   |
| Q05359 | ERP1   | 4  | 4  | 19.6 | 1.1539 | 59902000   |
| P35197 | GCS1   | 3  | 3  | 9.9  | 1.1535 | 17750000   |
| P38238 | TRM7   | 2  | 2  | 8.7  | 1.1527 | 33765000   |
| Q03496 | TRM732 | 6  | 6  | 4.1  | 1.1518 | 39294000   |
| P35723 | YET1   | 2  | 2  | 10.7 | 1.1513 | 38423000   |
| P53843 | IST1   | 2  | 2  | 7    | 1.1513 | 8637700    |
| P32381 | ARP2   | 2  | 2  | 7.4  | 1.1509 | 52808000   |
| P53743 | ESF2   | 3  | 3  | 11.7 | 1.1503 | 6030100    |
| Q01852 | TIM44  | 4  | 4  | 12.5 | 1.1498 | 27019000   |
| P25617 |        | 7  | 7  | 31   | 1.1482 | 67716000   |
| P36123 | SAP190 | 3  | 3  | 4.3  | 1.147  | 13592000   |
| Q04264 | PDS5   | 6  | 6  | 7    | 1.1453 | 50865000   |
| P04801 | THS1   | 7  | 7  | 13.6 | 1.1443 | 112770000  |
| Q07478 | SUB2   | 4  | 4  | 12.1 | 1.1439 | 37126000   |
| P33767 | WBP1   | 3  | 3  | 10   | 1.1435 | 27290000   |
| P00958 | MES1   | 15 | 15 | 21.7 | 1.142  | 366190000  |
| P41819 | DIM1   | 2  | 2  | 6.9  | 1.1411 | 38386000   |
| P53079 | COG1   | 4  | 4  | 11.3 | 1.1411 | 24089000   |
| P21269 | CCA1   | 3  | 3  | 7.7  | 1.1403 | 16076000   |
| Q12035 | FCF2   | 3  | 3  | 22.1 | 1.1403 | 42376000   |
| P53600 | RET3   | 5  | 5  | 38.1 | 1.1399 | 95558000   |
| P30665 | MCM4   | 2  | 2  | 3.3  | 1.1397 | 8939000    |
| P38694 | MSC7   | 7  | 7  | 12.9 | 1.1397 | 81485000   |
| P39998 | EDC3   | 3  | 3  | 8.7  | 1.1384 | 17090000   |
| P04802 | DPS1   | 9  | 9  | 17.8 | 1.138  | 190650000  |
| P43556 | RGD2   | 2  | 2  | 5.9  | 1.1379 | 11656000   |
| Q04347 | BUD22  | 4  | 4  | 8.9  | 1.1363 | 13352000   |
| P47006 | RPA34  | 8  | 8  | 45.9 | 1.1357 | 513490000  |

|               |               |    |    |      |        |            |
|---------------|---------------|----|----|------|--------|------------|
| P53847        | DSL1          | 3  | 3  | 4    | 1.1357 | 10883000   |
| Q12136        | SAS10         | 3  | 3  | 5.6  | 1.1351 | 30957000   |
| P40079        | LCP5          | 2  | 2  | 3.9  | 1.1345 | 18376000   |
| P38272        | SHE3          | 5  | 5  | 12.5 | 1.1343 | 52897000   |
| P38697;P39567 | IMD2          | 11 | 5  | 37.7 | 1.1343 | 99584000   |
| P53883        | NOP13         | 11 | 11 | 30.8 | 1.1342 | 117340000  |
| P39078        | CCT4          | 7  | 7  | 16.5 | 1.1337 | 160470000  |
| P33299        | RPT1          | 4  | 4  | 9.2  | 1.1336 | 178010000  |
| Q08412        | CUE5          | 4  | 4  | 9.5  | 1.1335 | 20599000   |
| P32790        | SLA1          | 4  | 4  | 2.8  | 1.1332 | 21363000   |
| P36775        | PIM1          | 7  | 7  | 6.5  | 1.133  | 26952000   |
| P32563        | VPH1          | 7  | 7  | 12.4 | 1.131  | 255400000  |
| P38333        | ENP1          | 5  | 5  | 17.4 | 1.131  | 32836000   |
| Q08745;P46784 | RPS10A;RPS10B | 5  | 5  | 40   | 1.1306 | 1523500000 |
| P04050        | RPO21         | 6  | 6  | 5.1  | 1.1305 | 74786000   |
| P25574        | EMC1          | 3  | 3  | 3.4  | 1.1305 | 14656000   |
| P53723        |               | 3  | 3  | 8.2  | 1.1303 | 58016000   |
| P39109        | YCF1          | 8  | 8  | 8.3  | 1.1301 | 103160000  |
| P25360        | PHO87         | 2  | 1  | 2.6  | 1.1298 | 10254000   |
| P32259        | SIN4          | 5  | 5  | 7.1  | 1.1293 | 25647000   |
| P39079        | CCT6          | 8  | 8  | 19   | 1.1272 | 198520000  |
| Q12220        | DIP2          | 6  | 6  | 6.7  | 1.1265 | 21022000   |
| P36051        | MCD4          | 3  | 3  | 4.8  | 1.1251 | 12390000   |
| P53941        | IMP4          | 3  | 3  | 10.7 | 1.1246 | 17712000   |
| POCX36;POCX35 | RPS4B;RPS4A   | 6  | 6  | 37.2 | 1.1244 | 417890000  |
| P42945        | UTP10         | 7  | 7  | 5.3  | 1.1238 | 42749000   |
| P02294;P02293 | HTB2;HTB1     | 2  | 2  | 15.3 | 1.1227 | 316740000  |
| P32463        | ACP1          | 3  | 3  | 35.2 | 1.1226 | 16641000   |
| P32349        | RPC82         | 2  | 2  | 4.3  | 1.1206 | 7703000    |
| Q02776        | TIM50         | 6  | 6  | 16.8 | 1.1204 | 65281000   |
| P47089        | TMA22         | 4  | 4  | 23.2 | 1.1198 | 42704000   |
| P46672        | ARC1          | 6  | 6  | 15.4 | 1.1194 | 149890000  |
| P33201        | MRT4          | 6  | 6  | 30.9 | 1.1193 | 220740000  |

|               |               |    |    |      |        |            |
|---------------|---------------|----|----|------|--------|------------|
| P07281;P07280 | RPS19B;RPS19A | 4  | 4  | 34   | 1.1191 | 1560500000 |
| P11484        | SSB1          | 19 | 1  | 52.7 | 1.1169 | 8570900000 |
| P38250        | IST2          | 10 | 10 | 12.9 | 1.1168 | 113620000  |
| POC2H8        | RPL31A        | 5  | 1  | 60.2 | 1.1166 | 1249700000 |
| Q05515        | SVF1          | 3  | 3  | 6.9  | 1.1166 | 36279000   |
| P31384        | CCR4          | 3  | 3  | 3.6  | 1.1164 | 14851000   |
| P47117        | ARP3          | 2  | 2  | 10   | 1.1162 | 24672000   |
| P05750        | RPS3          | 5  | 5  | 19.6 | 1.1157 | 760320000  |
| P14127;P02407 | RPS17B;RPS17A | 5  | 5  | 51.5 | 1.1154 | 853550000  |
| P40462        | TMA108        | 12 | 12 | 19.5 | 1.1143 | 113140000  |
| P05748;P54780 | RPL15A;RPL15B | 3  | 3  | 17.6 | 1.114  | 676770000  |
| P26637        | CDC60         | 5  | 5  | 6.1  | 1.1139 | 23940000   |
| POCX28;POCX27 | RPL42B;RPL42A | 2  | 2  | 8.5  | 1.112  | 105630000  |
| P39006        | PSD1          | 3  | 3  | 8.6  | 1.1119 | 8964100    |
| P32074        | SEC21         | 10 | 10 | 19.5 | 1.1118 | 186100000  |
| P22224        | SEC15         | 4  | 4  | 5.5  | 1.1111 | 10684000   |
| P53221;P05743 | RPL26B;RPL26A | 4  | 4  | 32.3 | 1.1101 | 1863000000 |
| P29055        | SUA7          | 3  | 3  | 12.2 | 1.1099 | 18658000   |
| P53860        | PDR16         | 5  | 5  | 15.1 | 1.1094 | 36784000   |
| P28007        | GAR1          | 3  | 3  | 16.6 | 1.1087 | 94549000   |
| P53145        | LSG1          | 9  | 9  | 18.4 | 1.1082 | 73500000   |
| P07213        | TOM70         | 8  | 8  | 19.4 | 1.1081 | 221340000  |
| Q05946        | UTP13         | 9  | 9  | 18.1 | 1.1079 | 44955000   |
| P14020        | DPM1          | 4  | 4  | 14.2 | 1.1064 | 62276000   |
| P08566        | ARO1          | 18 | 18 | 15.7 | 1.1062 | 302810000  |
| P53721        | RCF2          | 3  | 3  | 19.2 | 1.106  | 20704000   |
| P06367;P39516 | RPS14A;RPS14B | 3  | 3  | 24.1 | 1.1049 | 349260000  |
| P33775        | PMT1          | 3  | 3  | 4.8  | 1.1048 | 43523000   |
| P16603        | NCP1          | 4  | 4  | 8.1  | 1.1044 | 30821000   |
| POCX54;POCX53 | RPL12B;RPL12A | 6  | 6  | 50.9 | 1.1026 | 1332900000 |
| Q02642        | EGD1          | 5  | 5  | 44.6 | 1.1023 | 975670000  |
| P25567        | SRO9          | 7  | 7  | 20.5 | 1.1022 | 369190000  |
| P24280        | SEC14         | 7  | 7  | 31.2 | 1.1019 | 83697000   |

|               |             |    |    |      |        |            |
|---------------|-------------|----|----|------|--------|------------|
| P0CX38;POCX37 | RPS6B;RPS6A | 5  | 5  | 31.4 | 1.1015 | 1168400000 |
| P53629        | ARE2        | 2  | 2  | 3.3  | 1.1015 | 32101000   |
| P39015        | STM1        | 9  | 9  | 50.2 | 1.1008 | 1187500000 |
| P26793        | RAD27       | 2  | 2  | 6.3  | 1.1002 | 4929600    |
| P38878        | LNP1        | 3  | 3  | 17.6 | 1.0993 | 31519000   |
| Q06679        | UTP4        | 5  | 5  | 9.4  | 1.0989 | 30211000   |
| P23644        | TOM40       | 2  | 2  | 7    | 1.0981 | 12655000   |
| P32264        | PRO1        | 3  | 3  | 10.7 | 1.0976 | 32091000   |
| P54781        | ERG5        | 3  | 3  | 6.3  | 1.0975 | 19968000   |
| Q08285        | RRP40       | 2  | 2  | 8.8  | 1.0974 | 10375000   |
| Q03648        |             | 4  | 4  | 8.3  | 1.0971 | 21675000   |
| Q12321        | MED1        | 3  | 3  | 7.4  | 1.0971 | 16867000   |
| P38221        | CDS1        | 4  | 4  | 8.8  | 1.0964 | 100240000  |
| P18239;P18238 | PET9        | 5  | 5  | 16.4 | 1.0951 | 364670000  |
| P42943        | CCT7        | 12 | 12 | 30.9 | 1.0943 | 572710000  |
| P41810        | SEC26       | 14 | 14 | 21   | 1.093  | 533720000  |
| P34237        | COY1        | 10 | 10 | 15.5 | 1.0929 | 52920000   |
| P32569        | SRB4        | 3  | 3  | 3.8  | 1.0925 | 11729000   |
| P47076        | RPC17       | 2  | 2  | 21.1 | 1.0923 | 10393000   |
| P33298        | RPT3        | 4  | 4  | 13.1 | 1.0909 | 91102000   |
| P47160        | ENT3        | 4  | 4  | 11.5 | 1.0905 | 23707000   |
| P12385        | SUP45       | 13 | 13 | 39.6 | 1.0902 | 264770000  |
| P38882        | UTP9        | 7  | 7  | 13.7 | 1.0899 | 63349000   |
| P25374        | NFS1        | 3  | 3  | 10.1 | 1.0897 | 62468000   |
| P19882        | HSP60       | 14 | 14 | 36.9 | 1.0895 | 978230000  |
| P46964        | OST2        | 1  | 1  | 13.1 | 1.0893 | 14171000   |
| P49089        | ASN1        | 12 | 10 | 33.2 | 1.0889 | 1625600000 |
| P41811        | SEC27       | 17 | 17 | 40.7 | 1.0881 | 424620000  |
| P06169        | PDC1        | 9  | 9  | 29.5 | 1.088  | 329430000  |
| P53011        | SEH1        | 3  | 3  | 6.9  | 1.0867 | 10011000   |
| Q04373        | PUF6        | 4  | 4  | 5.9  | 1.0866 | 76162000   |
| P39926        | SSO2        | 2  | 1  | 9.5  | 1.0865 | 6488100    |
| P38225        | FAT1        | 3  | 2  | 4.3  | 1.0863 | 25325000   |

|               |               |    |    |      |        |            |
|---------------|---------------|----|----|------|--------|------------|
| P11075        | SEC7          | 20 | 20 | 14.8 | 1.0862 | 232600000  |
| Q12118        | SGT2          | 6  | 6  | 13.6 | 1.0859 | 96361000   |
| P38711;P35997 | RPS27B;RPS27A | 3  | 3  | 50   | 1.0858 | 632350000  |
| P38996        | NAB3          | 2  | 2  | 3.6  | 1.0851 | 10628000   |
| P38219        | OLA1          | 3  | 3  | 13.2 | 1.0849 | 109090000  |
| Q12125        | GET4          | 4  | 4  | 17   | 1.0844 | 59732000   |
| P38682        | GLO3          | 5  | 5  | 15.4 | 1.0843 | 87891000   |
| POCX56;POCX55 | RPS18B;RPS18A | 6  | 6  | 42.5 | 1.0838 | 2001600000 |
| Q12019        | MDN1          | 31 | 31 | 7.9  | 1.0829 | 343500000  |
| P40024        | ARB1          | 11 | 11 | 19.2 | 1.0827 | 608350000  |
| P38708        | YHRO20W       | 10 | 10 | 19.5 | 1.0826 | 251130000  |
| P38737        | ECM29         | 8  | 8  | 5.5  | 1.0826 | 44555000   |
| Q12680        | GLT1          | 5  | 5  | 2.6  | 1.0821 | 30359000   |
| P46677        | TAF1          | 2  | 2  | 2.1  | 1.082  | 8871000    |
| P56628        | RPL22B        | 3  | 2  | 46.7 | 1.0813 | 60281000   |
| P15180        | KRS1          | 5  | 5  | 9.8  | 1.0795 | 60537000   |
| P40010        | NUG1          | 13 | 13 | 31.9 | 1.0794 | 198690000  |
| P32386;P38735 | YBT1          | 14 | 14 | 10.6 | 1.0793 | 201710000  |
| P12904        | SNF4          | 4  | 4  | 18   | 1.0777 | 43050000   |
| P38707        | DED81         | 7  | 7  | 18.1 | 1.0777 | 103650000  |
| Q06169        | PEX30         | 4  | 4  | 14.7 | 1.0777 | 26999000   |
| Q01560        | NPL3          | 4  | 4  | 11.4 | 1.0771 | 87343000   |
| P07703        | RPC40         | 6  | 6  | 31.3 | 1.0769 | 135330000  |
| P40327        | RPT2          | 12 | 12 | 42.6 | 1.075  | 351190000  |
| P40531        | GVP36         | 7  | 7  | 32.5 | 1.075  | 83976000   |
| P07560        | SEC4          | 6  | 6  | 39.1 | 1.0748 | 88805000   |
| P32568        | SNQ2          | 3  | 3  | 1.9  | 1.0747 | 31559000   |
| Q3E754;POCOV8 | RPS21B;RPS21A | 3  | 3  | 35.6 | 1.073  | 867520000  |
| Q12250        | RPNS          | 10 | 10 | 27   | 1.0729 | 165700000  |
| P32445        | RIM1          | 2  | 2  | 23   | 1.0723 | 63495000   |
| Q12285        | MDY2          | 7  | 7  | 43.9 | 1.072  | 169340000  |
| P26784        | RPL16A        | 10 | 6  | 44.7 | 1.0717 | 253750000  |
| P16649        | TUP1          | 6  | 6  | 13.7 | 1.071  | 34887000   |

|               |               |    |    |      |        |            |
|---------------|---------------|----|----|------|--------|------------|
| P29547        | CAM1          | 7  | 6  | 20.2 | 1.071  | 95367000   |
| POCX85;POCX84 | RPL35B;RPL35A | 5  | 5  | 25   | 1.0708 | 2067100000 |
| P38129        | TAF5          | 4  | 4  | 7.8  | 1.0708 | 36109000   |
| P02400        | RPP2B         | 5  | 5  | 81.8 | 1.0701 | 2119600000 |
| P20448        | HCA4          | 3  | 3  | 6.1  | 1.07   | 24352000   |
| Q08421        | ETT1          | 7  | 7  | 18.7 | 1.0699 | 187000000  |
| P43621        | RET2          | 3  | 3  | 8.1  | 1.0698 | 159120000  |
| Q99207        | NOP14         | 3  | 3  | 4.7  | 1.0693 | 27397000   |
| P29468        | PAP1          | 3  | 3  | 6.7  | 1.0691 | 25122000   |
| Q07897        | CMS1          | 2  | 2  | 9.3  | 1.0673 | 21391000   |
| P08964        | MYO1          | 3  | 3  | 2.1  | 1.0672 | 9420900    |
| P08524        | ERG20         | 3  | 3  | 12.8 | 1.0666 | 16535000   |
| Q08689        | NAT5          | 3  | 3  | 34.7 | 1.0665 | 38688000   |
| Q92316        | OST5          | 2  | 2  | 23.3 | 1.0658 | 11465000   |
| P19524        | MYO2          | 18 | 18 | 16.6 | 1.0655 | 107060000  |
| P40350        | ALG5          | 4  | 4  | 10.5 | 1.0651 | 38152000   |
| P50085        | PHB2          | 3  | 3  | 8.7  | 1.0648 | 32814000   |
| P32366        | VMA6          | 3  | 3  | 13.9 | 1.0644 | 102700000  |
| P32597        | STH1          | 3  | 3  | 2.6  | 1.0643 | 5542000    |
| P15646        | NOP1          | 5  | 5  | 14.7 | 1.0636 | 210170000  |
| P20436        | RPB8          | 1  | 1  | 14.4 | 1.0635 | 33086000   |
| P15367        | SEC11         | 2  | 2  | 13.2 | 1.0633 | 89848000   |
| Q02354        | UTP6          | 2  | 2  | 3.6  | 1.0633 | 3740200    |
| P38883        | RIX1          | 3  | 3  | 5.2  | 1.0631 | 797370000  |
| Q06142        | KAP95         | 3  | 3  | 6.2  | 1.0614 | 26803000   |
| P22138        | RPA135        | 8  | 8  | 14   | 1.0612 | 203580000  |
| P04456        | RPL25         | 6  | 6  | 49.3 | 1.061  | 1804400000 |
| Q12754        | RRP12         | 4  | 4  | 5.6  | 1.0608 | 39144000   |
| Q12464        | RVB2          | 7  | 7  | 22.7 | 1.0607 | 83835000   |
| P36421        | TYS1          | 6  | 6  | 13.7 | 1.0605 | 69456000   |
| P40540        | EMC5          | 3  | 3  | 24.1 | 1.0597 | 20457000   |
| P36008        | TEF4          | 10 | 9  | 27.7 | 1.0587 | 481960000  |
| P53622        | COP1          | 14 | 14 | 14.6 | 1.0585 | 382740000  |

|               |               |    |    |      |        |            |
|---------------|---------------|----|----|------|--------|------------|
| POC2H9        | RPL31B        | 5  | 1  | 60.2 | 1.0583 | 124800000  |
| Q07362        | PBP4          | 2  | 2  | 11.9 | 1.0573 | 12770000   |
| P10962        | MAK16         | 2  | 2  | 6.5  | 1.0571 | 13137000   |
| P47018        | MTC1          | 6  | 6  | 15.9 | 1.0571 | 45445000   |
| P38061        | RPL32         | 4  | 4  | 29.2 | 1.0568 | 498780000  |
| P38886        | RPN10         | 2  | 2  | 10.4 | 1.0568 | 42012000   |
| P40157        | VID27         | 3  | 3  | 3.7  | 1.0563 | 14307000   |
| P38701        | RPS20         | 7  | 7  | 66.1 | 1.0562 | 877290000  |
| P20434        | RPB5          | 5  | 5  | 42.8 | 1.056  | 74276000   |
| P38764        | RPN1          | 18 | 18 | 23.8 | 1.0558 | 484300000  |
| Q12018        | CDC53         | 14 | 14 | 26.6 | 1.0553 | 137490000  |
| P09032        | GCD1          | 10 | 10 | 27.3 | 1.0548 | 139860000  |
| P46655        | GUS1          | 11 | 11 | 19.9 | 1.0547 | 191490000  |
| P23248        | RPS1B         | 11 | 4  | 53.7 | 1.0546 | 477280000  |
| Q12387        | MDM20         | 3  | 3  | 3.5  | 1.0532 | 15306000   |
| P29453        | RPL8B         | 17 | 5  | 65.2 | 1.0524 | 6585300000 |
| Q12496        |               | 13 | 13 | 15   | 1.0514 | 102360000  |
| P07260        | CDC33         | 4  | 4  | 30.5 | 1.0511 | 341410000  |
| P31412        | VMA5          | 3  | 3  | 13   | 1.0509 | 9794500    |
| Q03195        | RLI1          | 3  | 3  | 5.8  | 1.0509 | 62041000   |
| P38788        | SSZ1          | 11 | 11 | 24.9 | 1.0505 | 1634500000 |
| Q02201        | OSH6          | 5  | 5  | 12.7 | 1.0501 | 34082000   |
| Q06287        | EMG1          | 3  | 3  | 13.1 | 1.0501 | 21738000   |
| P05318        | RPP1A         | 3  | 3  | 50.9 | 1.0494 | 749080000  |
| P40094        | COG3          | 8  | 8  | 11.9 | 1.0494 | 49944000   |
| POCX52;POCX51 | RPS16B;RPS16A | 7  | 7  | 40.6 | 1.0484 | 242670000  |
| P46990;P05740 | RPL17B;RPL17A | 5  | 5  | 35.9 | 1.0479 | 3013800000 |
| P10591        | SSA1          | 28 | 7  | 58.3 | 1.0467 | 578130000  |
| P38011        | ASC1          | 7  | 7  | 38.6 | 1.0467 | 673480000  |
| P89105        | CTR9          | 6  | 6  | 6.1  | 1.0452 | 46593000   |
| P25293        | NAP1          | 4  | 4  | 15.1 | 1.0436 | 78849000   |
| P53959        | COG6          | 7  | 7  | 11   | 1.0431 | 53835000   |
| P17076        | RPL8A         | 15 | 3  | 61.7 | 1.043  | 220950000  |



|                    |               |    |    |      |        |            |
|--------------------|---------------|----|----|------|--------|------------|
| P89102             | SEC5          | 3  | 3  | 2.8  | 1.043  | 64675000   |
| P32589             | SSE1          | 18 | 17 | 29.7 | 1.0429 | 701400000  |
| Q05468             | RQC1          | 6  | 6  | 7.3  | 1.0429 | 24712000   |
| Q02931             | NAN1          | 5  | 5  | 9.8  | 1.0425 | 37633000   |
| Q3E790             | TSC3          | 1  | 1  | 12.5 | 1.0425 | 32152000   |
| P25339             | PUF4          | 6  | 6  | 10.4 | 1.0414 | 85816000   |
| P38879             | EGD2          | 3  | 3  | 32.2 | 1.0413 | 491640000  |
| P25294             | SIS1          | 9  | 9  | 25.6 | 1.0412 | 473960000  |
| P33332             | SEC3          | 11 | 11 | 10.4 | 1.041  | 62090000   |
| POCX24;POCX23      | RPL20B;RPL20A | 3  | 3  | 24.4 | 1.0405 | 888880000  |
| P25847             | MSH2          | 4  | 4  | 5.6  | 1.0403 | 13603000   |
| Q08723;REV__Q08641 | RPN8          | 5  | 5  | 20.1 | 1.0403 | 89864000   |
| P10081             | TIF1          | 4  | 4  | 17.2 | 1.0399 | 68943000   |
| P40557             | EPS1          | 2  | 2  | 2.9  | 1.0399 | 46645000   |
| P07259             | URA2          | 38 | 38 | 22.7 | 1.0397 | 1751100000 |
| P33442             | RPS1A         | 11 | 4  | 50.6 | 1.039  | 2060200000 |
| P38631;P40989      | FKS1          | 7  | 7  | 6    | 1.039  | 125260000  |
| P40961             | PHB1          | 6  | 6  | 41.5 | 1.039  | 65183000   |
| P05739             | RPL6B         | 11 | 8  | 47.7 | 1.0382 | 5746700000 |
| Q07451             | YET3          | 4  | 4  | 21.2 | 1.0382 | 65211000   |
| P39002             | FAA3          | 4  | 2  | 5.3  | 1.0381 | 23577000   |
| P22140             | EPT1          | 1  | 1  | 3.3  | 1.0369 | 25088000   |
| Q03940             | RVB1          | 7  | 7  | 17.9 | 1.0369 | 129520000  |
| P43609             | RSC8          | 6  | 6  | 14.4 | 1.0362 | 29598000   |
| Q04062             | RPN9          | 9  | 9  | 26.7 | 1.0353 | 379470000  |
| P40075             | SCS2          | 6  | 6  | 38.5 | 1.0352 | 160380000  |
| P05737             | RPL7A         | 8  | 1  | 41.4 | 1.0347 | 3356700000 |
| P33297             | RPT5          | 9  | 9  | 36.2 | 1.0347 | 289880000  |
| P05317             | RPP0          | 6  | 6  | 29.8 | 1.0346 | 1487600000 |
| P32803             | EMP24         | 1  | 1  | 8.4  | 1.0345 | 14346000   |
| P40016             | RPN3          | 6  | 6  | 15.9 | 1.0345 | 237180000  |
| P48570             | LYS20         | 4  | 2  | 14.7 | 1.0332 | 140150000  |
| P38797             | PTC7          | 3  | 3  | 12.5 | 1.0329 | 9026000    |

|               |               |    |    |      |        |            |
|---------------|---------------|----|----|------|--------|------------|
| Q6Q547        | NOP10         | 2  | 2  | 37.9 | 1.0323 | 69176000   |
| P32588        | PUB1          | 4  | 4  | 11.9 | 1.0322 | 150070000  |
| P32832        | NPL6          | 4  | 4  | 11   | 1.0308 | 16288000   |
| P38902        | RPB11         | 2  | 2  | 20.8 | 1.0293 | 25823000   |
| P40509        | SEC28         | 6  | 6  | 33.1 | 1.0288 | 174160000  |
| P32496        | RPN12         | 9  | 9  | 46   | 1.0284 | 352800000  |
| Q02753;Q12672 | RPL21A;RPL21B | 5  | 5  | 43.1 | 1.028  | 1109500000 |
| Q05022        | RRP5          | 36 | 36 | 30.2 | 1.0276 | 521210000  |
| P10964        | RPA190        | 27 | 27 | 21.8 | 1.0273 | 772030000  |
| P32527        | ZUO1          | 11 | 11 | 40.4 | 1.0273 | 429670000  |
| P38811        | TRA1          | 3  | 3  | 1    | 1.0265 | 11190000   |
| P25303        | SCJ1          | 2  | 2  | 7.2  | 1.0261 | 22778000   |
| POC2H6;POC2H7 | RPL27A;RPL27B | 9  | 9  | 68.4 | 1.0253 | 1938500000 |
| P28000        | RPC19         | 4  | 4  | 43   | 1.0248 | 31300000   |
| P46675        | STU2          | 2  | 2  | 2.9  | 1.0248 | 8586800    |
| P13382        | POL1          | 2  | 2  | 1.2  | 1.0245 | 9963100    |
| P19414        | ACO1          | 7  | 7  | 14   | 1.024  | 122770000  |
| Q01080        | RPA49         | 7  | 7  | 24.3 | 1.0234 | 120940000  |
| P32342        | SRP21         | 1  | 1  | 11.4 | 1.0233 | 45670000   |
| Q04781        | RKR1          | 7  | 7  | 4.7  | 1.0231 | 34736000   |
| P36161        | NUP133        | 4  | 4  | 5.2  | 1.0228 | 25903000   |
| POCX30;POCX29 | RPS23B;RPS23A | 2  | 2  | 26.9 | 1.0216 | 26494000   |
| P38986        | ASP1          | 6  | 6  | 19.4 | 1.0215 | 118220000  |
| Q08965        | BMS1          | 2  | 2  | 2.1  | 1.0208 | 23960000   |
| Q06706        | IKI3          | 5  | 5  | 4.4  | 1.0206 | 54339000   |
| P32565        | RPN2          | 12 | 12 | 14.5 | 1.0201 | 274740000  |
| P32368        | SAC1          | 12 | 12 | 31.1 | 1.019  | 245670000  |
| P32902        | MRP4          | 3  | 3  | 10.7 | 1.0186 | 16374000   |
| P25694        | CDC48         | 18 | 18 | 30.8 | 1.0181 | 490990000  |
| P14907        | NSP1          | 4  | 4  | 6.2  | 1.0177 | 48266000   |
| P49090        | ASN2          | 6  | 4  | 17.7 | 1.0176 | 25281000   |
| P38629        | RFC3          | 7  | 7  | 30.6 | 1.0171 | 68233000   |
| P40302        | PRE5          | 3  | 3  | 21.8 | 1.0169 | 53956000   |

|               |               |    |    |      |        |            |
|---------------|---------------|----|----|------|--------|------------|
| Q12159        | YRA1          | 4  | 4  | 15   | 1.0162 | 190650000  |
| P49167        | RPL38         | 3  | 3  | 38.5 | 1.0158 | 124880000  |
| POCX83;POCX82 | RPL19B;RPL19A | 4  | 4  | 27   | 1.0156 | 141630000  |
| P10664        | RPL4A         | 5  | 2  | 13.5 | 1.0156 | 745280000  |
| P50095;O42831 | IMD3          | 13 | 7  | 43.2 | 1.0153 | 1429600000 |
| P15442        | GCN2          | 2  | 2  | 1.6  | 1.0148 | 8824800    |
| P30822        | CRM1          | 15 | 15 | 14.8 | 1.0148 | 428060000  |
| P32379        | PUP2          | 3  | 3  | 16.9 | 1.0146 | 83028000   |
| P33333        | SLC1          | 7  | 7  | 28.7 | 1.0142 | 127900000  |
| P02406        | RPL28         | 7  | 7  | 43   | 1.0141 | 1600300000 |
| Q01939        | RPT6          | 8  | 8  | 26.7 | 1.0141 | 233930000  |
| P38555;P51996 | YPT31         | 4  | 4  | 24.7 | 1.014  | 52400000   |
| P20049        | TYR1          | 4  | 4  | 10.6 | 1.0139 | 13269000   |
| Q03103        | ERO1          | 3  | 3  | 7.8  | 1.0136 | 22874000   |
| P32776        | TFB1          | 2  | 2  | 4.8  | 1.0134 | 4857600    |
| Q04779        | RCO1          | 3  | 3  | 5.7  | 1.0131 | 5998700    |
| P38754;P36105 | RPL14B;RPL14A | 5  | 5  | 26.1 | 1.0129 | 659850000  |
| P22936        | APN1          | 2  | 2  | 5.4  | 1.0126 | 6404900    |
| POCX44;POCX43 | RPL1B;RPL1A   | 11 | 11 | 41.9 | 1.0125 | 1446400000 |
| Q03973        | HMO1          | 3  | 3  | 17.5 | 1.0118 | 36660000   |
| P47077        | NOP9          | 4  | 4  | 7.1  | 1.0111 | 17263000   |
| P20606        | SAR1          | 3  | 3  | 23.7 | 1.011  | 52088000   |
| P43593        | UBP6          | 5  | 5  | 15.2 | 1.0103 | 46354000   |
| P14741        | GCN3          | 5  | 5  | 17.7 | 1.0102 | 76442000   |
| P21243        | SCL1          | 4  | 4  | 21.8 | 1.0102 | 20619000   |
| P25443        | RPS2          | 5  | 5  | 39   | 1.01   | 1043400000 |
| P33750        | SOF1          | 2  | 2  | 8    | 1.0098 | 18363000   |
| P32558        | SPT16         | 5  | 5  | 5.9  | 1.009  | 27035000   |
| P48164        | RPS7B         | 13 | 6  | 57.4 | 1.0088 | 1569700000 |
| P22202;P09435 | SSA4;SSA3     | 7  | 2  | 11.5 | 1.0086 | 14611000   |
| POCX48;POCX47 | RPS11B;RPS11A | 3  | 3  | 16   | 1.0085 | 195790000  |
| P05738        | RPL9A         | 7  | 2  | 35.1 | 1.0084 | 3206200000 |
| P05749        | RPL22A        | 4  | 3  | 65.3 | 1.008  | 1424500000 |

|               |               |    |    |      |         |            |
|---------------|---------------|----|----|------|---------|------------|
| Q12402        | YOP1          | 1  | 1  | 6.7  | 1.0079  | 29643000   |
| Q02326        | RPL6A         | 9  | 6  | 48.9 | 1.0078  | 736440000  |
| Q07527        | TRM3          | 5  | 5  | 4.7  | 1.0077  | 16076000   |
| P00359        | TDH3          | 11 | 3  | 57.2 | 1.0074  | 942040000  |
| P23639        | PRE8          | 3  | 3  | 11.6 | 1.0072  | 68482000   |
| Q08954        | YPL199C       | 2  | 2  | 10   | 1.0067  | 13787000   |
| P38431        | TIF5          | 10 | 10 | 37.5 | 1.0058  | 278530000  |
| P05755;O13516 | RPS9B;RPS9A   | 3  | 3  | 15.4 | 1.0056  | 716460000  |
| P53914        | KRE33         | 9  | 9  | 10.9 | 1.0056  | 122940000  |
| Q12460        | NOP56         | 11 | 10 | 26.8 | 1.0056  | 871870000  |
| P40471        | AYR1          | 1  | 1  | 5.7  | 1.0052  | 20619000   |
| POCX32;POCX31 | RPS24B;RPS24A | 4  | 4  | 44.4 | 1.0038  | 395370000  |
| P34160        | STO1          | 3  | 3  | 3.9  | 1.0038  | 21062000   |
| Q3E7Y3;POCOW1 | RPS22B;RPS22A | 2  | 2  | 18.5 | 1.0029  | 258050000  |
| P49626        | RPL4B         | 5  | 2  | 13.5 | 1.0011  | 39690000   |
| P26785        | RPL16B        | 11 | 7  | 35.9 | 1.0003  | 493730000  |
| P48231        | TCB2          | 5  | 5  | 5.7  | 1.0003  | 31263000   |
| P41805        | RPL10         | 6  | 6  | 24.9 | 0.99934 | 471440000  |
| P14922        | CYC8          | 4  | 4  | 6.1  | 0.99799 | 35165000   |
| P52593        | NUP188        | 3  | 3  | 1.6  | 0.99786 | 20604000   |
| P46971        | PMT4          | 3  | 3  | 5.4  | 0.99762 | 11100000   |
| P00549        | CDC19         | 14 | 14 | 42   | 0.99761 | 1038100000 |
| P25655        | CDC39         | 7  | 7  | 5.9  | 0.99696 | 49509000   |
| P42949        | PAM16         | 2  | 2  | 16.1 | 0.99689 | 44618000   |
| Q03088        | SVL3          | 4  | 4  | 4.7  | 0.99688 | 23282000   |
| P20447        | DBP3          | 9  | 9  | 26   | 0.99608 | 131180000  |
| P41834        | UFE1          | 2  | 2  | 8.1  | 0.99582 | 15934000   |
| Q07807        | PUF3          | 7  | 7  | 10.8 | 0.99577 | 35977000   |
| P06105        | SCP160        | 38 | 38 | 36.7 | 0.99451 | 1371200000 |
| P39985        | POL5          | 4  | 4  | 4.5  | 0.99416 | 21764000   |
| P01123        | YPT1          | 2  | 2  | 9.7  | 0.99383 | 44248000   |
| Q3E792        | RPS25A        | 3  | 1  | 30.6 | 0.9931  | 150200000  |
| P02829        | HSP82         | 26 | 5  | 38.8 | 0.99248 | 136070000  |

|        |         |    |    |      |         |           |
|--------|---------|----|----|------|---------|-----------|
| P50094 | IMD4    | 11 | 9  | 40.1 | 0.9924  | 284650000 |
| P35732 | DEF1    | 10 | 10 | 21.1 | 0.9916  | 95421000  |
| P40150 | SSB2    | 19 | 1  | 52.7 | 0.99033 | 169110000 |
| P26786 | RPS7A   | 13 | 6  | 63.2 | 0.98929 | 580260000 |
| P26321 | RPL5    | 4  | 4  | 24.6 | 0.98803 | 163860000 |
| P53114 | NUT1    | 3  | 3  | 2.7  | 0.98699 | 12582000  |
| P43573 | BUD27   | 6  | 6  | 9    | 0.98679 | 26714000  |
| P38203 | LSM2    | 3  | 3  | 36.8 | 0.9867  | 41101000  |
| Q03532 | HAS1    | 6  | 6  | 13.9 | 0.9867  | 68320000  |
| Q12499 | NOP58   | 13 | 12 | 36.8 | 0.98636 | 455500000 |
| Q03280 | TOM1    | 6  | 6  | 2.4  | 0.98539 | 43471000  |
| P21827 | SRM1    | 2  | 2  | 5    | 0.98515 | 12687000  |
| P40345 | LRO1    | 3  | 3  | 6.7  | 0.98497 | 15752000  |
| P46995 | SET2    | 2  | 2  | 2.9  | 0.9841  | 13860000  |
| Q06344 | ESF1    | 5  | 5  | 11   | 0.98369 | 24957000  |
| Q08972 | NEW1    | 20 | 20 | 21.4 | 0.98368 | 510490000 |
| P04449 | RPL24A  | 6  | 2  | 23.2 | 0.98226 | 732140000 |
| P46985 | MNN11   | 3  | 3  | 9    | 0.98165 | 14249000  |
| P00815 | HIS4    | 9  | 9  | 14.5 | 0.98101 | 138800000 |
| Q03010 | UME1    | 4  | 4  | 12   | 0.97964 | 24667000  |
| P33322 | CBF5    | 8  | 8  | 20.7 | 0.97949 | 77792000  |
| P32481 | GCD11   | 10 | 10 | 22.8 | 0.97902 | 216090000 |
| P39935 | TIF4631 | 11 | 11 | 19.9 | 0.97902 | 113350000 |
| P38805 | RPF1    | 2  | 2  | 10.2 | 0.9787  | 29203000  |
| P22134 | MAG1    | 3  | 3  | 9.8  | 0.97865 | 39379000  |
| P43588 | RPN11   | 4  | 4  | 18.3 | 0.97834 | 113850000 |
| P14120 | RPL30   | 4  | 4  | 53.3 | 0.97814 | 680140000 |
| P10659 | SAM1    | 7  | 3  | 27   | 0.9778  | 140040000 |
| P39676 | YHB1    | 2  | 2  | 8    | 0.97756 | 11842000  |
| P40070 | LSM4    | 3  | 3  | 15   | 0.97729 | 49806000  |
| P49723 | RNR4    | 6  | 6  | 20.9 | 0.97684 | 31658000  |
| Q12377 | RPN6    | 11 | 11 | 32.5 | 0.97681 | 360950000 |
| Q12133 | SPC3    | 2  | 2  | 13   | 0.97672 | 16574000  |

|                         |         |    |    |      |         |           |
|-------------------------|---------|----|----|------|---------|-----------|
| P25632                  | RSC6    | 3  | 3  | 7.5  | 0.97529 | 10601000  |
| P42846                  | KRI1    | 8  | 8  | 15.4 | 0.97525 | 112370000 |
| P25367                  | RNQ1    | 2  | 2  | 10.6 | 0.97478 | 124210000 |
| Q06631                  | BFR2    | 6  | 6  | 16.1 | 0.97458 | 52542000  |
| P53741                  | BRE5    | 7  | 7  | 23.7 | 0.97415 | 76395000  |
| P36080                  | RRP14   | 2  | 2  | 4.4  | 0.9734  | 9128200   |
| P32861                  | UGP1    | 6  | 6  | 19   | 0.97314 | 35188000  |
| P33338                  | SLA2    | 5  | 5  | 7    | 0.97198 | 75644000  |
| P53549                  | RPT4    | 6  | 6  | 16   | 0.97046 | 462290000 |
| P32502                  | GCD7    | 5  | 5  | 21.3 | 0.97039 | 62703000  |
| Q06839                  | YPR097W | 13 | 13 | 16.7 | 0.96966 | 118680000 |
| P20459                  | SUI2    | 10 | 10 | 38.5 | 0.96875 | 253970000 |
| P25298                  | RNA14   | 3  | 3  | 4.3  | 0.96828 | 14940000  |
| P25555                  | GBP2    | 2  | 2  | 6.6  | 0.96814 | 25655000  |
| P09440                  | MIS1    | 18 | 18 | 21.9 | 0.96761 | 384920000 |
| P24000                  | RPL24B  | 5  | 1  | 23.2 | 0.96737 | 140830000 |
| P36049                  | EBP2    | 10 | 10 | 27.9 | 0.96576 | 175480000 |
| P06634                  | DED1    | 8  | 8  | 19.4 | 0.96518 | 112580000 |
| P34110;REV__Q3E747;REV_ | VPS35   | 5  | 5  | 7.1  | 0.96426 | 26514000  |
| P20433                  | RPB4    | 2  | 2  | 19.9 | 0.96396 | 11670000  |
| Q12447                  | PAA1    | 4  | 4  | 30.4 | 0.96345 | 79513000  |
| P29478                  | SEC65   | 4  | 4  | 20.9 | 0.96341 | 45877000  |
| P36144                  | UTP30   | 3  | 3  | 10.9 | 0.96297 | 5325000   |
| P38251                  | RFC5    | 4  | 4  | 16.4 | 0.96294 | 24954000  |
| P48836                  | VMA10   | 3  | 3  | 36.8 | 0.96265 | 93092000  |
| P32419                  | MDH3    | 9  | 9  | 40.8 | 0.96093 | 244210000 |
| Q08951                  | APL5    | 4  | 4  | 5.8  | 0.96084 | 35392000  |
| Q02792                  | RAT1    | 2  | 2  | 2.7  | 0.95924 | 15858000  |
| Q99257                  | MEX67   | 5  | 5  | 11.9 | 0.95867 | 57590000  |
| P20051                  | URA4    | 4  | 4  | 13.2 | 0.95845 | 52559000  |
| P36036                  | YRA2    | 2  | 2  | 16.3 | 0.95799 | 7092700   |
| Q12267                  | SMC4    | 3  | 3  | 2.5  | 0.95779 | 5729800   |
| P38295                  | EHT1    | 3  | 3  | 11.3 | 0.95777 | 9099800   |

|                          |                     |    |    |      |         |            |
|--------------------------|---------------------|----|----|------|---------|------------|
| P38912                   | TIF11               | 2  | 2  | 13.7 | 0.95753 | 22110000   |
| Q02793                   | SKI8                | 2  | 2  | 4.5  | 0.95737 | 13754000   |
| P38825                   | TOM71               | 8  | 8  | 13   | 0.95709 | 74133000   |
| P32787                   | MGM101              | 5  | 5  | 25.7 | 0.9569  | 27786000   |
| P08518                   | RPB2                | 2  | 2  | 2.2  | 0.95686 | 16410000   |
| Q03497                   | STE20               | 3  | 3  | 3.6  | 0.95635 | 12576000   |
| Q06106                   | MRD1                | 5  | 5  | 8.6  | 0.95633 | 29129000   |
| P47069                   | MPS3                | 2  | 2  | 3.7  | 0.9556  | 6305000    |
| P16550                   | APA1                | 7  | 7  | 28.7 | 0.95533 | 125240000  |
| P38861                   | NMD3                | 3  | 3  | 6.9  | 0.95502 | 22894000   |
| Q08162                   | DIS3                | 2  | 2  | 2.8  | 0.95499 | 9412400    |
| P47061                   | VPS53               | 2  | 2  | 1.8  | 0.95436 | 10786000   |
| Q04673                   | SSL1                | 2  | 2  | 4.1  | 0.95431 | 4150400    |
| Q12024                   | YTM1                | 4  | 4  | 10.2 | 0.95416 | 57859000   |
| P19097                   | FAS2                | 48 | 48 | 37.2 | 0.95321 | 2363600000 |
| P39744                   | NOC2                | 4  | 4  | 6.5  | 0.95314 | 55522000   |
| P07149                   | FAS1                | 28 | 28 | 18.6 | 0.95269 | 1438700000 |
| P53550                   | DCP2                | 6  | 6  | 7.7  | 0.95231 | 61186000   |
| P33307                   | CSE1                | 5  | 5  | 10.6 | 0.95224 | 29022000   |
| P00358                   | TDH2                | 11 | 2  | 54.8 | 0.95194 | 78311000   |
| P06103                   | PRT1                | 10 | 10 | 17.4 | 0.95172 | 365370000  |
| P32497                   | NIP1                | 9  | 9  | 13.2 | 0.94996 | 314670000  |
| P05759;POCH09;POCH08;POC | RPS31;RPL40B;RPL40C | 6  | 6  | 43.4 | 0.94843 | 763020000  |
| P32916                   | SRP101              | 7  | 7  | 18.5 | 0.94824 | 79691000   |
| P40991                   | NOP2                | 7  | 7  | 14.1 | 0.94814 | 103330000  |
| Q12522                   | TIF6                | 1  | 1  | 6.9  | 0.94799 | 22094000   |
| Q04660                   | ERB1                | 6  | 6  | 9.5  | 0.94772 | 101600000  |
| P00899                   | TRP2                | 3  | 3  | 5.5  | 0.94726 | 28962000   |
| P32908                   | SMC1                | 10 | 10 | 8.7  | 0.94603 | 106690000  |
| P36160                   | RPF2                | 2  | 2  | 6.7  | 0.94507 | 70046000   |
| Q05567                   | DPL1                | 7  | 7  | 19.7 | 0.94506 | 149760000  |
| P32639                   | BRR2                | 9  | 9  | 5.2  | 0.94504 | 40980000   |
| P38934                   | BFR1                | 18 | 18 | 40.6 | 0.94382 | 757080000  |

|                                                |        |    |    |      |         |             |
|------------------------------------------------|--------|----|----|------|---------|-------------|
| P36018                                         | YPT52  | 2  | 2  | 17.9 | 0.94373 | 48346000    |
| Q99383                                         | HRP1   | 4  | 4  | 12.9 | 0.94365 | 62595000    |
| P46669                                         | RPA43  | 6  | 6  | 16   | 0.94313 | 279300000   |
| P40217                                         | TIF34  | 11 | 11 | 36   | 0.94289 | 435090000   |
| Q12165                                         | ATP16  | 2  | 2  | 32.5 | 0.94276 | 23026000    |
| P08417                                         | FUM1   | 2  | 2  | 5.5  | 0.94227 | 17541000    |
| P39524                                         | DRS2   | 6  | 6  | 6.8  | 0.94157 | 36094000    |
| P43535                                         | GCN20  | 15 | 15 | 27.9 | 0.94105 | 563630000   |
| P80210                                         | ADE12  | 2  | 2  | 4.8  | 0.94091 | 5031400     |
| P38174                                         | MAP2   | 5  | 5  | 15   | 0.94051 | 34383000    |
| P21560                                         | CBP3   | 5  | 5  | 15.5 | 0.94022 | 29591000    |
| P22146                                         | GAS1   | 4  | 4  | 13.8 | 0.93985 | 71669000    |
| P30902                                         | ATP7   | 3  | 3  | 25.3 | 0.93926 | 37205000    |
| P47037                                         | SMC3   | 11 | 11 | 12.7 | 0.9392  | 110800000   |
| P41911                                         | GPD2   | 4  | 3  | 15.9 | 0.93917 | 99778000    |
| P02994                                         | TEF1   | 14 | 14 | 48.5 | 0.93843 | 12637000000 |
| P32523                                         | PRP19  | 4  | 4  | 9.3  | 0.93834 | 24548000    |
| P32939                                         | YPT7   | 3  | 3  | 16.3 | 0.93734 | 102430000   |
| P22579                                         | SIN3   | 11 | 11 | 7.5  | 0.93695 | 62523000    |
| P40362                                         | UTP18  | 3  | 3  | 7.6  | 0.93525 | 44318000    |
| P38199                                         | HEK2   | 3  | 3  | 9.2  | 0.93513 | 30507000    |
| P41056                                         | RPL33B | 3  | 1  | 37.4 | 0.93439 | 58628000    |
| P38164                                         | SEA4   | 2  | 2  | 2.7  | 0.9339  | 7043500     |
| P29295                                         | HRR25  | 2  | 2  | 3.6  | 0.93264 | 5386000     |
| Q06103                                         | RPN7   | 6  | 6  | 18.9 | 0.93153 | 122220000   |
| P0C2J3;Q03494;Q12491;Q12492;TY2B-LR1;TY2B-DR2; |        | 2  | 1  | 1.4  | 0.93135 | 8573500     |
| P37292                                         | SHM1   | 7  | 7  | 21.4 | 0.93113 | 80906000    |
| P32495                                         | NHP2   | 2  | 2  | 27.6 | 0.92989 | 108680000   |
| P50086                                         | NAS6   | 4  | 4  | 17.1 | 0.92966 | 24299000    |
| Q06632                                         | CFT1   | 5  | 5  | 5.1  | 0.92859 | 18879000    |
| P52286                                         | SKP1   | 2  | 2  | 10.3 | 0.92851 | 26440000    |
| P32591;REV__P46958                             | SWI3   | 4  | 4  | 6.2  | 0.92848 | 18688000    |
| P14126                                         | RPL3   | 11 | 11 | 33.3 | 0.92831 | 2472500000  |



|                          |                     |    |    |      |         |            |
|--------------------------|---------------------|----|----|------|---------|------------|
| Q04969                   | SPC2                | 3  | 3  | 21.9 | 0.92752 | 20624000   |
| P39904                   | VPS52               | 5  | 5  | 11.1 | 0.92745 | 13640000   |
| P40477                   | NUP159              | 2  | 2  | 1.6  | 0.92734 | 9736300    |
| P39517                   | DHH1                | 4  | 4  | 8.3  | 0.92714 | 75203000   |
| P39936;REV__P34078       | TIF4632             | 7  | 7  | 10.8 | 0.92662 | 41880000   |
| P38630                   | RFC1                | 2  | 2  | 2    | 0.92616 | 4349000    |
| P04147                   | PAB1                | 16 | 16 | 36.2 | 0.92511 | 2495800000 |
| P25582                   | SPB1                | 4  | 4  | 4.4  | 0.92491 | 128580000  |
| P51401                   | RPL9B               | 6  | 1  | 31.4 | 0.92491 | 41727000   |
| P38249                   | RPG1                | 19 | 19 | 23.1 | 0.92475 | 525100000  |
| P07256                   | COR1                | 4  | 4  | 12   | 0.92207 | 13000000   |
| P53141                   | MLC1                | 6  | 6  | 32.2 | 0.92198 | 67849000   |
| P38323                   | MCX1                | 4  | 4  | 10   | 0.92159 | 25798000   |
| P37291                   | SHM2                | 9  | 9  | 26.7 | 0.9213  | 89224000   |
| P35189                   | TAF14               | 2  | 2  | 6.6  | 0.92122 | 17460000   |
| P40348                   | RFC2                | 5  | 5  | 21   | 0.92061 | 40052000   |
| Q01662                   | MAP1                | 4  | 4  | 17.1 | 0.92044 | 77125000   |
| POC216;P47098;Q03612;Q03 | TY1B-LR3;TY1B-JR1;1 | 9  | 0  | 6.8  | 0.92035 | 294280000  |
| P09064                   | SUI3                | 11 | 11 | 41.4 | 0.91961 | 203120000  |
| P31374                   | PSK1                | 3  | 3  | 2.9  | 0.91943 | 9816400    |
| P38759                   | VPS29               | 2  | 2  | 11.7 | 0.91895 | 23916000   |
| Q99316                   | MPD2                | 2  | 2  | 6.9  | 0.91858 | 10112000   |
| P38850                   | RTT107              | 2  | 2  | 2.2  | 0.9182  | 9612200    |
| P05626                   | ATP4                | 6  | 6  | 27   | 0.91789 | 52692000   |
| P15625                   | FRS2                | 6  | 6  | 12.3 | 0.91733 | 36128000   |
| P38523                   | MGE1                | 2  | 2  | 16.2 | 0.91721 | 15473000   |
| P19263                   | RGR1                | 2  | 2  | 2.9  | 0.91707 | 13587000   |
| P23201                   | SPA2                | 3  | 3  | 3.5  | 0.91688 | 18263000   |
| P34248                   |                     | 5  | 5  | 10.6 | 0.91606 | 42306000   |
| P25644                   | PAT1                | 3  | 3  | 6.8  | 0.91582 | 25864000   |
| P89886                   | TMA20               | 6  | 6  | 39.2 | 0.91574 | 90620000   |
| P07248                   | ADR1                | 3  | 3  | 2.9  | 0.91569 | 6177000    |
| P53040                   | TAF6                | 4  | 4  | 11.4 | 0.91483 | 8804000    |

|               |               |    |    |      |         |           |
|---------------|---------------|----|----|------|---------|-----------|
| Q12034        | SLF1          | 4  | 4  | 13   | 0.91426 | 19706000  |
| P45976        | FIP1          | 4  | 4  | 21.1 | 0.91416 | 28461000  |
| Q12234        | RUD3          | 4  | 4  | 11   | 0.9141  | 31724000  |
| P32521        | PAN1          | 3  | 3  | 3.9  | 0.91325 | 18153000  |
| P33399        | LHP1          | 2  | 2  | 11.3 | 0.91312 | 15233000  |
| P40215        | NDE1          | 11 | 11 | 24.8 | 0.91303 | 158760000 |
| P18759        | SEC18         | 11 | 11 | 20.2 | 0.91262 | 121910000 |
| P42941        | SER2          | 2  | 2  | 8.4  | 0.9115  | 5093800   |
| P49334        | TOM22         | 2  | 2  | 29.6 | 0.9111  | 40160000  |
| P32501        | GCD6          | 5  | 5  | 7.9  | 0.911   | 80230000  |
| P33441        | MFT1          | 2  | 2  | 7.1  | 0.91096 | 11006000  |
| P35191        | MDJ1          | 2  | 2  | 5.7  | 0.90979 | 126650000 |
| POCS90;P39987 | SSC1          | 17 | 17 | 34.9 | 0.90938 | 952620000 |
| Q05775        | HCR1          | 3  | 3  | 16.2 | 0.90885 | 110240000 |
| P35207        | SKI2          | 7  | 7  | 7.1  | 0.90867 | 29024000  |
| P38968        | SEC31         | 16 | 16 | 16.3 | 0.90716 | 247250000 |
| Q03640        | TCB3          | 17 | 17 | 16.1 | 0.90611 | 200720000 |
| P12945        | NAT1          | 7  | 7  | 9.7  | 0.90474 | 60280000  |
| P38688        | SRP72         | 7  | 7  | 10.8 | 0.90302 | 48739000  |
| P38297        | FZO1          | 3  | 3  | 4.3  | 0.90282 | 15508000  |
| Q02204        | MRPL13        | 4  | 4  | 28   | 0.90221 | 35292000  |
| Q03016        | GIP3          | 4  | 4  | 3.4  | 0.90212 | 5445300   |
| P40825        | ALA1          | 7  | 7  | 7.5  | 0.90197 | 54494000  |
| P32465        | HXT1          | 2  | 2  | 4.9  | 0.90128 | 40330000  |
| P22214        | SEC22         | 2  | 2  | 14.5 | 0.901   | 11695000  |
| P34078        | LTV1          | 2  | 2  | 4.1  | 0.90068 | 11425000  |
| POCX50;POCX49 | RPL18B;RPL18A | 2  | 2  | 19.4 | 0.90054 | 119650000 |
| P20084        | MRPL33        | 2  | 2  | 23.3 | 0.89952 | 17861000  |
| P38632        | MMS21         | 2  | 2  | 9.7  | 0.89846 | 8306000   |
| P53075        | SHE10         | 7  | 7  | 14   | 0.89828 | 141530000 |
| P20424        | SRP54         | 4  | 4  | 8.5  | 0.89824 | 45039000  |
| P39692        | MET10         | 8  | 8  | 11.7 | 0.89791 | 37329000  |
| Q03124        | RSC9          | 2  | 2  | 5    | 0.8964  | 10718000  |

|               |           |    |    |      |         |           |
|---------------|-----------|----|----|------|---------|-----------|
| P25368        | RRP7      | 2  | 2  | 7.1  | 0.89633 | 28231000  |
| P41807        | VMA13     | 9  | 9  | 22.8 | 0.89623 | 225040000 |
| P38077        | ATP3      | 7  | 7  | 29.9 | 0.89566 | 144860000 |
| P40202        | CCS1      | 3  | 3  | 17.7 | 0.89535 | 47228000  |
| P05694        | MET6      | 4  | 4  | 6.9  | 0.89526 | 39051000  |
| Q04491        | SEC13     | 4  | 4  | 12.1 | 0.8943  | 146970000 |
| P05744        | RPL33A    | 3  | 1  | 37.4 | 0.89341 | 156610000 |
| P36048        | SNU114    | 2  | 2  | 2    | 0.89276 | 11423000  |
| Q04632        | COG8      | 2  | 2  | 6.8  | 0.89241 | 6429000   |
| P21242        | PRE10     | 4  | 4  | 18.1 | 0.89229 | 23626000  |
| Q08179        | MDM38     | 12 | 12 | 29.5 | 0.89215 | 111510000 |
| P11745        | RNA1      | 5  | 5  | 20.9 | 0.89103 | 79282000  |
| Q07457        | BRE1      | 14 | 14 | 27   | 0.89075 | 77270000  |
| P25343        | RVS161    | 4  | 4  | 22.3 | 0.8905  | 82776000  |
| P17555        | SRV2      | 10 | 10 | 28.7 | 0.88996 | 135780000 |
| P38845        | CRP1      | 10 | 10 | 33.3 | 0.88852 | 171440000 |
| P25386        | USO1      | 33 | 33 | 20.9 | 0.88823 | 352460000 |
| P05453        | SUP35     | 10 | 10 | 18.7 | 0.88741 | 252970000 |
| Q02821        | SRP1      | 3  | 3  | 8.7  | 0.88576 | 56928000  |
| Q03661        | ESC1      | 5  | 5  | 4.5  | 0.88575 | 15198000  |
| P38985        | SRP14     | 3  | 3  | 24   | 0.88534 | 51322000  |
| P40078        | NSA2      | 3  | 3  | 20.7 | 0.8822  | 11571000  |
| P38779        | CIC1      | 5  | 5  | 16.2 | 0.88193 | 55639000  |
| Q07878        | VPS13     | 15 | 15 | 6.7  | 0.8809  | 106490000 |
| P47068        | BBC1      | 8  | 8  | 8.3  | 0.87959 | 74398000  |
| P21306        | ATP15     | 2  | 2  | 56.5 | 0.8791  | 16244000  |
| P09734        | TUB3      | 4  | 2  | 11   | 0.87872 | 27324000  |
| Q92331        | VPS5      | 3  | 3  | 4    | 0.87836 | 22346000  |
| P19146;P11076 | ARF2;ARF1 | 1  | 1  | 11.6 | 0.87719 | 15362000  |
| P31383        | TPD3      | 8  | 8  | 15   | 0.87717 | 65209000  |
| P32266        | MGM1      | 6  | 6  | 10.9 | 0.8771  | 20035000  |
| Q06678        | MRPL35    | 3  | 3  | 12.3 | 0.87677 | 15775000  |
| P22203        | VMA4      | 9  | 9  | 49.4 | 0.87601 | 187800000 |

|               |             |    |    |      |         |           |
|---------------|-------------|----|----|------|---------|-----------|
| POCX40;POCX39 | RPS8B;RPS8A | 2  | 2  | 18   | 0.8755  | 8196400   |
| P32561        | RPD3        | 3  | 3  | 14.5 | 0.87544 | 59724000  |
| P38626        | CBR1        | 4  | 4  | 23.6 | 0.87523 | 31628000  |
| P36148        | GPT2        | 2  | 2  | 3.6  | 0.87505 | 22538000  |
| P19358        | SAM2        | 7  | 3  | 28.6 | 0.87463 | 18535000  |
| P33202        | UFD4        | 3  | 3  | 2.4  | 0.87453 | 7764500   |
| P53885        | MDG1        | 2  | 2  | 6    | 0.87435 | 4604400   |
| P40007        | NOP16       | 3  | 3  | 10.8 | 0.87434 | 20837000  |
| P36516        | MRPL3       | 5  | 5  | 16.9 | 0.87427 | 40457000  |
| P38170        | BRN1        | 3  | 3  | 6.1  | 0.87403 | 9549100   |
| Q12532        | RQC2        | 6  | 6  | 6.5  | 0.87282 | 59542000  |
| Q04119        | PPN1        | 3  | 3  | 5.9  | 0.8725  | 13493000  |
| P09457        | ATP5        | 7  | 7  | 40.1 | 0.87206 | 155400000 |
| Q12028        | APL4        | 7  | 7  | 12.3 | 0.87198 | 31269000  |
| P09436        | ILS1        | 6  | 6  | 9.8  | 0.87122 | 36312000  |
| P53254        | UTP22       | 9  | 9  | 9.3  | 0.87087 | 95847000  |
| P37293        | NAT2        | 2  | 2  | 6.6  | 0.8694  | 12548000  |
| Q06214        | JIP5        | 2  | 2  | 4.7  | 0.86929 | 5554000   |
| P53866        | SQS1        | 3  | 3  | 5.3  | 0.86892 | 16098000  |
| P39954        | SAH1        | 6  | 6  | 16.9 | 0.8688  | 56487000  |
| P17255        | VMA1        | 12 | 12 | 15.4 | 0.86821 | 206270000 |
| P00546        | CDC28       | 2  | 2  | 10.1 | 0.86686 | 31470000  |
| P53628        | SNF12       | 3  | 3  | 7.8  | 0.86647 | 9091800   |
| P40533        | TED1        | 2  | 2  | 3.4  | 0.86463 | 22129000  |
| P07251        | ATP1        | 5  | 5  | 10.6 | 0.86426 | 156100000 |
| P39101        | CAJ1        | 10 | 10 | 32.2 | 0.86418 | 164970000 |
| P36528        | MRPL17      | 6  | 6  | 18.9 | 0.86405 | 28316000  |
| P54000        | SUB1        | 3  | 3  | 14.4 | 0.86294 | 4068600   |
| Q00402        | NUM1        | 11 | 11 | 18.6 | 0.86245 | 110970000 |
| P40457        | MLP2        | 4  | 4  | 2.3  | 0.86217 | 21440000  |
| Q06493        | YLH47       | 2  | 2  | 7.9  | 0.86181 | 26389000  |
| P19658        | EXO70       | 5  | 5  | 9    | 0.86067 | 29906000  |
| Q12417        | PRP46       | 2  | 2  | 6.4  | 0.85987 | 4037200   |

|               |         |    |    |      |         |            |
|---------------|---------|----|----|------|---------|------------|
| P15703        | BGL2    | 5  | 5  | 24.9 | 0.85959 | 79061000   |
| P06102        | NOT3    | 4  | 4  | 4.2  | 0.85771 | 17032000   |
| P12686        | MRP13   | 3  | 3  | 10.3 | 0.85565 | 26130000   |
| P53206        | YGR012W | 2  | 2  | 7.1  | 0.85529 | 7973800    |
| P38153        | APM3    | 2  | 2  | 6    | 0.85422 | 10920000   |
| P36523        | MRPL15  | 2  | 2  | 10.7 | 0.85366 | 11501000   |
| Q06179        | FMP27   | 5  | 5  | 2.2  | 0.85322 | 9347400    |
| P22147        | XRN1    | 27 | 27 | 24.7 | 0.85301 | 422610000  |
| P17967        | PDI1    | 10 | 10 | 27   | 0.8514  | 159390000  |
| P32844        | SEC6    | 5  | 5  | 5.6  | 0.85076 | 32423000   |
| P53297        | PBP1    | 5  | 5  | 9.3  | 0.84618 | 27287000   |
| P17629        | HPR1    | 2  | 2  | 3.1  | 0.84585 | 9185000    |
| Q06205        | FPR4    | 3  | 2  | 10.2 | 0.84506 | 63904000   |
| Q03690        | CLU1    | 18 | 18 | 18.5 | 0.8443  | 385990000  |
| P39990        | SNU13   | 2  | 2  | 11.9 | 0.84406 | 183740000  |
| P17883        | SKI3    | 5  | 5  | 3.8  | 0.84376 | 19087000   |
| P51601        | FOL2    | 3  | 3  | 18.5 | 0.84318 | 436010000  |
| Q02969        | PEX25   | 2  | 2  | 8.9  | 0.84267 | 17782000   |
| P00330;P00331 | ADH1    | 10 | 10 | 37.6 | 0.84189 | 2484500000 |
| P00830        | ATP2    | 9  | 9  | 29.2 | 0.84154 | 239820000  |
| P40416        | ATM1    | 2  | 2  | 3.8  | 0.84068 | 4879100    |
| P47166        | SGM1    | 4  | 4  | 6.9  | 0.83919 | 9586300    |
| Q12453        | CEX1    | 2  | 2  | 2.8  | 0.83905 | 9176400    |
| Q03529        | SCS7    | 2  | 2  | 3.4  | 0.83881 | 12838000   |
| Q12114        | CHS5    | 2  | 2  | 5.2  | 0.83847 | 23901000   |
| P36112        | MIC60   | 2  | 2  | 5.4  | 0.83823 | 9382800    |
| P43611        | OSW7    | 3  | 3  | 9    | 0.83587 | 18457000   |
| P39010        | AKR1    | 3  | 3  | 5.2  | 0.83574 | 16585000   |
| P42940        | CIR1    | 2  | 2  | 12.6 | 0.83455 | 8295600    |
| P53163        | MNP1    | 3  | 3  | 20.1 | 0.83437 | 129340000  |
| Q06685        | VIP1    | 5  | 5  | 6.4  | 0.83353 | 15706000   |
| P32499        | NUP2    | 10 | 10 | 20   | 0.83299 | 114180000  |
| P32582        | CYS4    | 4  | 4  | 9.7  | 0.83298 | 27506000   |

|        |           |    |    |      |         |           |
|--------|-----------|----|----|------|---------|-----------|
| Q06078 | UTP21     | 2  | 2  | 4.2  | 0.83267 | 16887000  |
| P09733 | TUB1      | 5  | 3  | 16.3 | 0.83239 | 177680000 |
| P28777 | ARO2      | 4  | 4  | 16.2 | 0.83155 | 14598000  |
| Q12514 | NOT5      | 2  | 2  | 5    | 0.83114 | 11909000  |
| P38286 | IFA38     | 8  | 8  | 29.4 | 0.82964 | 141600000 |
| P03872 | REP2      | 2  | 2  | 9.5  | 0.82831 | 11529000  |
| Q12487 | MRPL23    | 2  | 2  | 17.2 | 0.82726 | 25561000  |
| Q02455 | MLP1      | 9  | 9  | 6.6  | 0.82681 | 44163000  |
| Q06833 | YPR091C   | 2  | 2  | 4    | 0.82668 | 16707000  |
| Q3E830 | YCR075W-A | 3  | 3  | 86.7 | 0.82505 | 12836000  |
| P54861 | DNM1      | 6  | 6  | 12.2 | 0.82484 | 28833000  |
| Q01477 | UBP3      | 6  | 6  | 12.4 | 0.82383 | 47811000  |
| P40040 | THO1      | 4  | 4  | 29.4 | 0.82265 | 41348000  |
| P39743 | RVS167    | 5  | 5  | 13.3 | 0.82211 | 85653000  |
| P47057 | SNX4      | 4  | 4  | 11.8 | 0.82118 | 25562000  |
| P50087 | MIC26     | 4  | 4  | 23.6 | 0.82028 | 40673000  |
| P35719 | MRP8      | 1  | 1  | 4.6  | 0.8192  | 44002000  |
| Q04279 | SEG1      | 1  | 1  | 2.5  | 0.81904 | 5166700   |
| Q01217 | ARG5,6    | 4  | 4  | 6.1  | 0.81685 | 18584000  |
| P54115 | ALD6      | 12 | 12 | 25.6 | 0.81523 | 173260000 |
| Q12071 | VPS54     | 4  | 4  | 5.6  | 0.81399 | 13235000  |
| P38687 | SRP68     | 11 | 11 | 25.7 | 0.81228 | 74740000  |
| P40856 | SAP185    | 2  | 2  | 2.2  | 0.81181 | 17835000  |
| P41832 | BNI1      | 2  | 2  | 1.1  | 0.8116  | 3502700   |
| P40356 | PGD1      | 2  | 2  | 4.8  | 0.81113 | 18172000  |
| Q04217 | ECM16     | 2  | 2  | 1.6  | 0.81046 | 8287200   |
| P36041 | EAP1      | 5  | 5  | 13.6 | 0.81043 | 33072000  |
| P50109 | PSP2      | 5  | 5  | 10.3 | 0.81012 | 30486000  |
| P34760 | TSA1      | 3  | 3  | 24   | 0.8076  | 111960000 |
| P41940 | PSA1      | 8  | 8  | 29.6 | 0.80569 | 249770000 |
| P39976 | DLD3      | 4  | 4  | 10.9 | 0.80354 | 31886000  |
| P38625 | GUA1      | 3  | 3  | 8    | 0.80329 | 27136000  |
| P32529 | RPA12     | 2  | 2  | 19.2 | 0.80303 | 111530000 |

|               |           |    |    |      |         |           |
|---------------|-----------|----|----|------|---------|-----------|
| Q08229        | NBA1      | 3  | 3  | 10.4 | 0.80261 | 9543400   |
| P38234        | RFS1      | 2  | 2  | 13.3 | 0.80157 | 7843100   |
| Q06489        | MRI1      | 2  | 2  | 6.6  | 0.80135 | 6537500   |
| P07245        | ADE3      | 24 | 24 | 35.9 | 0.80034 | 101860000 |
| P48415        | SEC16     | 7  | 7  | 4.8  | 0.79806 | 43481000  |
| P53875        | MRPL19    | 2  | 2  | 10.8 | 0.79569 | 9007600   |
| P32457        | CDC3      | 13 | 13 | 37.5 | 0.79371 | 153990000 |
| P38137        | PCS60     | 2  | 2  | 3.7  | 0.79221 | 8465100   |
| P15303        | SEC23     | 3  | 3  | 7.3  | 0.79218 | 12718000  |
| P19454        | CKA2      | 5  | 5  | 14.7 | 0.78947 | 49551000  |
| P02992        | TUF1      | 2  | 2  | 6.6  | 0.78806 | 41828000  |
| P32835;P32836 | GSP1;GSP2 | 2  | 2  | 9.6  | 0.78782 | 49222000  |
| Q12466        | TCB1      | 5  | 5  | 7.7  | 0.78687 | 28487000  |
| P48439        | OST3      | 2  | 2  | 5.7  | 0.78576 | 15051000  |
| P22137        | CHC1      | 30 | 30 | 26.4 | 0.78519 | 982660000 |
| P32855        | SEC8      | 4  | 4  | 6.6  | 0.78284 | 39277000  |
| P29311        | BMH1      | 7  | 3  | 40.8 | 0.7821  | 249730000 |
| P54838        | DAK1      | 11 | 11 | 25   | 0.78004 | 148850000 |
| P10080        | SBP1      | 7  | 7  | 40.5 | 0.77913 | 425880000 |
| P38122        | ECM31     | 4  | 4  | 18.3 | 0.77888 | 35077000  |
| P07267        | PEP4      | 7  | 7  | 23.5 | 0.77862 | 211530000 |
| P54860        | UFD2      | 7  | 7  | 12.1 | 0.77589 | 33149000  |
| P30624        | FAA1      | 13 | 13 | 23.3 | 0.7757  | 169990000 |
| P28834        | IDH1      | 5  | 5  | 22.2 | 0.7746  | 90875000  |
| P01120        | RAS2      | 3  | 3  | 15.5 | 0.77431 | 47977000  |
| P39927        | PTI1      | 2  | 2  | 5.6  | 0.77106 | 6791000   |
| P05756        | RPS13     | 3  | 3  | 19.9 | 0.77063 | 51844000  |
| P39730        | FUN12     | 10 | 10 | 14.8 | 0.77031 | 115630000 |
| P39721        | AIM2      | 3  | 3  | 15   | 0.76932 | 18175000  |
| P35817        | BDF1      | 4  | 4  | 8.3  | 0.76915 | 16650000  |
| P40485        | SLM1      | 4  | 4  | 6.3  | 0.76914 | 14500000  |
| P17891        | CLC1      | 5  | 5  | 20.6 | 0.76594 | 127990000 |
| Q99189        | MTR10     | 2  | 2  | 2.5  | 0.76404 | 7583700   |

|        |         |    |    |      |         |           |
|--------|---------|----|----|------|---------|-----------|
| P17558 | PET123  | 3  | 3  | 9.7  | 0.75986 | 12917000  |
| P80967 | TOM5    | 1  | 1  | 28   | 0.75941 | 20254000  |
| P00925 | ENO2    | 12 | 9  | 39.8 | 0.7589  | 780340000 |
| P07264 | LEU1    | 3  | 3  | 7.3  | 0.75808 | 19990000  |
| P34730 | BMH2    | 6  | 2  | 31.9 | 0.75616 | 23780000  |
| Q12389 | DBP10   | 3  | 3  | 2.5  | 0.75582 | 16242000  |
| P53316 | YGR250C | 4  | 4  | 5.8  | 0.75047 | 18651000  |
| P32914 | SPT4    | 2  | 2  | 39.2 | 0.75014 | 62274000  |
| P09624 | LPD1    | 2  | 2  | 5.2  | 0.74988 | 6580500   |
| P24276 | SSD1    | 2  | 2  | 1.8  | 0.7498  | 19704000  |
| P36006 | MYO3    | 4  | 4  | 4.3  | 0.74934 | 27913000  |
| Q06704 | IMH1    | 18 | 18 | 23.3 | 0.74748 | 166860000 |
| P19880 | YAP1    | 2  | 2  | 5.4  | 0.74629 | 4685400   |
| P40582 | GTT1    | 3  | 3  | 15.4 | 0.74528 | 19980000  |
| P31539 | HSP104  | 4  | 4  | 5    | 0.74477 | 13926000  |
| P53292 | MRPS35  | 2  | 2  | 7.2  | 0.74472 | 8836500   |
| P53729 |         | 2  | 2  | 7.2  | 0.74443 | 4748900   |
| P25349 | YCP4    | 3  | 3  | 16.2 | 0.74173 | 30350000  |
| P00942 | TPI1    | 3  | 3  | 21   | 0.7357  | 32723000  |
| P07246 | ADH3    | 5  | 5  | 15.2 | 0.73427 | 35289000  |
| P07257 | QCR2    | 5  | 5  | 23.6 | 0.73412 | 26372000  |
| P15891 | ABP1    | 4  | 4  | 12.3 | 0.73296 | 81455000  |
| P00931 | TRP5    | 6  | 6  | 10   | 0.73029 | 47119000  |
| P23254 | TKL1    | 2  | 2  | 3.1  | 0.72849 | 16407000  |
| P25623 | SYP1    | 5  | 5  | 5.7  | 0.72388 | 38397000  |
| Q06385 | VPS74   | 3  | 3  | 7.8  | 0.72268 | 19646000  |
| P07244 | ADE5,7  | 6  | 6  | 12.6 | 0.72232 | 53952000  |
| Q08685 | CLP1    | 2  | 2  | 6.1  | 0.72179 | 4690300   |
| P04840 | POR1    | 9  | 9  | 47.7 | 0.72142 | 374020000 |
| P35725 |         | 2  | 2  | 26.3 | 0.71575 | 10359000  |
| P39540 | ELO1    | 2  | 2  | 4.5  | 0.71553 | 12755000  |
| P15019 | TAL1    | 3  | 3  | 14.6 | 0.71459 | 13180000  |
| P16140 | VMA2    | 4  | 4  | 11.6 | 0.71067 | 246890000 |



|        |       |    |    |      |         |           |
|--------|-------|----|----|------|---------|-----------|
| P07283 | SEC53 | 3  | 3  | 12.6 | 0.70751 | 7827600   |
| Q05029 | BCH1  | 2  | 2  | 4.3  | 0.70713 | 11321000  |
| Q04458 | HFD1  | 2  | 2  | 3.6  | 0.70513 | 10537000  |
| P21576 | VPS1  | 7  | 7  | 13.1 | 0.70104 | 96167000  |
| P27929 | NAM9  | 2  | 2  | 4.3  | 0.69985 | 5137800   |
| P53954 | ALG11 | 3  | 3  | 5.8  | 0.69933 | 11802000  |
| P00560 | PGK1  | 14 | 14 | 37.5 | 0.69892 | 487040000 |
| P32340 | NDI1  | 4  | 4  | 11.5 | 0.69815 | 13876000  |
| Q03707 | SRC1  | 2  | 2  | 3.2  | 0.69508 | 17367000  |
| Q08245 | ZEO1  | 5  | 5  | 46   | 0.69316 | 36743000  |
| P38713 | OSH3  | 4  | 4  | 4.8  | 0.69241 | 10563000  |
| P36139 | PET10 | 4  | 4  | 15.9 | 0.6915  | 27349000  |
| P20967 | KGD1  | 11 | 11 | 14.8 | 0.69009 | 245230000 |
| P12687 | MRP7  | 2  | 2  | 6.7  | 0.69002 | 15129000  |
| P25342 | CDC10 | 3  | 3  | 14.3 | 0.68841 | 57234000  |
| P32843 | YME2  | 4  | 4  | 5.4  | 0.68728 | 11796000  |
| P12709 | PGI1  | 8  | 8  | 20.8 | 0.68554 | 120770000 |
| P27614 | CPS1  | 3  | 3  | 5.6  | 0.685   | 60056000  |
| Q03201 | RSM10 | 2  | 2  | 11.3 | 0.68388 | 5466400   |
| P32468 | CDC12 | 4  | 4  | 11.5 | 0.68222 | 36869000  |
| P60010 | ACT1  | 3  | 3  | 9.6  | 0.678   | 37942000  |
| Q05050 | EIS1  | 16 | 16 | 25   | 0.67761 | 146110000 |
| P52918 | MSN5  | 2  | 2  | 1.3  | 0.67512 | 12938000  |
| P27692 | SPT5  | 9  | 9  | 12.8 | 0.67481 | 72541000  |
| P42073 | REF2  | 2  | 2  | 3.6  | 0.67356 | 11996000  |
| P38071 | ETR1  | 5  | 5  | 18.7 | 0.67311 | 63665000  |
| P46367 | ALD4  | 4  | 3  | 8.7  | 0.67311 | 4364700   |
| P36056 | RSM22 | 2  | 2  | 3.2  | 0.67241 | 6066800   |
| P12753 | RAD50 | 2  | 2  | 2    | 0.67088 | 3327200   |
| P32909 | SMY2  | 4  | 4  | 9.6  | 0.66941 | 10001000  |
| P14540 | FBA1  | 9  | 9  | 39   | 0.66602 | 623520000 |
| P34216 | EDE1  | 12 | 12 | 13.6 | 0.66314 | 126890000 |
| P53252 | PIL1  | 2  | 2  | 10.6 | 0.65287 | 70211000  |

|               |           |    |    |      |         |           |
|---------------|-----------|----|----|------|---------|-----------|
| P36525        | MRPL24    | 2  | 2  | 7    | 0.6519  | 11855000  |
| Q12344        | GYP5      | 4  | 4  | 6.6  | 0.64985 | 19822000  |
| P36015        | YKT6      | 3  | 3  | 11.5 | 0.6492  | 9122600   |
| P38198        | STU1      | 2  | 2  | 1.1  | 0.6404  | 12299000  |
| P07278        | BCY1      | 4  | 4  | 13.7 | 0.63794 | 25183000  |
| P10662        | MRP1      | 2  | 2  | 5.6  | 0.63275 | 13173000  |
| Q12335        | PST2      | 3  | 3  | 17.2 | 0.63119 | 37072000  |
| P35177        | SPT7      | 2  | 2  | 2.7  | 0.62793 | 11910000  |
| P22217        | TRX1      | 6  | 5  | 56.3 | 0.62603 | 364650000 |
| P28321        | YJU3      | 2  | 2  | 8.9  | 0.61137 | 10365000  |
| P53278        | YGR130C   | 8  | 8  | 14   | 0.60879 | 38744000  |
| P53981        |           | 2  | 2  | 11.2 | 0.60704 | 8910600   |
| P22803        | TRX2      | 7  | 6  | 70.2 | 0.60643 | 858870000 |
| P38636        | ATX1      | 2  | 2  | 42.5 | 0.60363 | 12347000  |
| Q12745        | SEC39     | 2  | 2  | 2.4  | 0.60176 | 9860800   |
| P32263        | PRO3      | 3  | 3  | 14.7 | 0.60067 | 13431000  |
| P19262        | KGD2      | 2  | 2  | 8.4  | 0.59493 | 37015000  |
| P31116        | HOM6      | 3  | 3  | 8.1  | 0.59041 | 10247000  |
| P38439        | LEO1      | 2  | 2  | 8.6  | 0.58969 | 9907400   |
| P14904        | APE1      | 2  | 2  | 4.3  | 0.58709 | 23176000  |
| P46682        | APL6      | 3  | 3  | 4.3  | 0.58508 | 17724000  |
| P16387        | PDA1      | 6  | 6  | 24.5 | 0.57031 | 642390000 |
| P16451        | PDX1      | 11 | 11 | 39.3 | 0.56004 | 189130000 |
| P17695        | GRX2      | 2  | 2  | 16.1 | 0.55588 | 30235000  |
| P38910        | HSP10     | 3  | 3  | 41.5 | 0.55312 | 24096000  |
| P48606        | RBL2      | 4  | 4  | 50   | 0.5466  | 16236000  |
| P00890        | CIT1      | 7  | 6  | 22.1 | 0.54411 | 111270000 |
| Q05541        | NSE3      | 2  | 2  | 8.6  | 0.5429  | 7378700   |
| P04046        | ADE4      | 4  | 4  | 8.4  | 0.52728 | 79644000  |
| P38712        | RRP3      | 2  | 2  | 6.4  | 0.51832 | 7787900   |
| P14832        | CPR1      | 2  | 2  | 13   | 0.5148  | 14015000  |
| P12695        | LAT1      | 9  | 9  | 19.1 | 0.51475 | 809210000 |
| P41277;P40106 | GPP1;GPP2 | 4  | 4  | 24   | 0.50385 | 43703000  |

|                                             |           |   |   |          |         |           |
|---------------------------------------------|-----------|---|---|----------|---------|-----------|
| P32473                                      | PDB1      | 2 | 2 | 8.2      | 0.49651 | 30338000  |
| Q03161                                      |           | 2 | 2 | 9.4      | 0.48742 | 20691000  |
| P47096                                      | BNA1      | 3 | 3 | 18.6     | 0.44858 | 40816000  |
| P40364                                      | MPM1      | 3 | 3 | 19       | 0.44812 | 14575000  |
| P15274                                      | AMD1      | 3 | 3 | 5.3      | 0.44601 | 24624000  |
| P35184                                      | SQT1      | 2 | 2 | 6.3      | 0.43005 | 9667500   |
| P28241                                      | IDH2      | 3 | 3 | 14.6     | 0.42973 | 115740000 |
| P40185                                      | MMF1      | 3 | 3 | 24.1     | 0.42944 | 18832000  |
| P29509                                      | TRR1      | 4 | 4 | 23.5     | 0.41584 | 8459400   |
| P32792                                      | YSC83     | 2 | 2 | 4.4      | 0.38954 | 8478500   |
| P32454                                      | APE2      | 5 | 3 | 6.7      | 0.3838  | 7267300   |
| Q06096                                      | COG4      | 2 | 2 | 2.6      | 0.37146 | 54230000  |
| P00817                                      | IPP1      | 3 | 3 | 13.6     | 0.36168 | 40326000  |
| Q07657                                      | SHS1      | 4 | 4 | 10       | 0.3451  | 13577000  |
| P02557                                      | TUB2      | 1 | 1 | 3.1      | 0.34085 | 50914000  |
| P38013                                      | AHP1      | 3 | 3 | 29.5     | 0.33817 | 11273000  |
| Q04767                                      | TVP18     | 3 | 3 | 25.7     | 0.31367 | 64118000  |
| Q01802                                      | AAT1      | 2 | 2 | 4.2      | 0.30779 | 32623000  |
| P04807                                      | HXK2      | 3 | 3 | 9.9      | 0.28777 | 32370000  |
| P00924                                      | ENO1      | 6 | 3 | 18.1     | 0.27732 | 28568000  |
| P35691                                      | TMA19     | 3 | 3 | 18.6     | 0.27234 | 26536000  |
| P15992                                      | HSP26     | 4 | 4 | 26.6     | 0.23901 | 49482000  |
| P00360                                      | TDH1      | 7 | 3 | 33.7     | 0.21778 | 19208000  |
| Q12749                                      | SMC6      | 2 | 2 | 1.6      | 0.19759 | 37570000  |
| P38616                                      | YGP1      | 2 | 2 | 6.8      | 0.17082 | 53489000  |
| P33309                                      | DOM34     | 2 | 2 | 8        | 0.14571 | 21880000  |
| P31787                                      | ACB1      | 2 | 2 | 39.1     | 0.14421 | 19783000  |
| P39004;P39003                               | HXT7;HXT6 | 4 | 4 | 14.9     | 0.13649 | 60848000  |
| P04806                                      | HXK1      | 2 | 2 | 8.5      | 0.0206  | 33673000  |
| O13563                                      | RPN13     | 1 | 1 | 8.3 NaN  |         | 60250000  |
| O14455                                      | RPL36B    | 1 | 1 | 10 NaN   |         | 3039900   |
| O74302;POCX57;POCX58;P47 TY1A-DR4;TY1A-A;TY |           | 5 | 0 | 16.8 NaN |         | 0         |
| P00427                                      | COX6      | 1 | 1 | 4.7 NaN  |         | 8824100   |

|                          |                   |   |   |          |          |
|--------------------------|-------------------|---|---|----------|----------|
| P00729                   | PRC1              | 1 | 1 | 3.4 NaN  | 7401800  |
| P00927                   | ILV1              | 1 | 1 | 3.5 NaN  | 6904400  |
| P02309                   | HHF1              | 1 | 1 | 11.7 NaN | 11453000 |
| P03871                   | REP1              | 1 | 1 | 3.2 NaN  | 12711000 |
| P04051                   | RPO31             | 2 | 2 | 2 NaN    | 7858800  |
| P04076                   | ARG4              | 1 | 1 | 1.7 NaN  | 2545100  |
| P04803                   | MSW1              | 1 | 1 | 3.2 NaN  | 0        |
| P04912;P04911            | HTA2;HTA1         | 1 | 1 | 17.4 NaN | 24595000 |
| P06197                   | PIS1              | 1 | 1 | 4.1 NaN  | 2445100  |
| P06704                   | CDC31             | 1 | 1 | 5 NaN    | 1640900  |
| P06787                   | CMD1              | 1 | 1 | 6.1 NaN  | 5727400  |
| P06839                   | RAD3              | 1 | 1 | 2.7 NaN  | 1610600  |
| P07253                   | CBP6              | 1 | 1 | 6.8 NaN  | 4176000  |
| P07255                   | COX9              | 1 | 1 | 16.9 NaN | 6490800  |
| P07263                   | HTS1              | 1 | 1 | 3.1 NaN  | 2889600  |
| P07284                   | SES1              | 1 | 1 | 2.8 NaN  | 0        |
| P07347                   | ARD1              | 1 | 1 | 3.4 NaN  | 18389000 |
| P08004                   | CHS1              | 2 | 2 | 2.3 NaN  | 4713900  |
| P08525                   | QCR8              | 1 | 1 | 12.8 NaN | 2048400  |
| POC0T4                   | RPS25B            | 3 | 1 | 30.6 NaN | 0        |
| Q04670;POC2J0;Q92393;Q12 | TY1B-MR2;TY1B-PR2 | 9 | 0 | 7.8 NaN  | 11707000 |
| POCX42;POCX41            | RPL23B;RPL23A     | 2 | 2 | 19.7 NaN | 9020900  |
| P10363                   | PRI1              | 1 | 1 | 1.7 NaN  | 32555000 |
| P11412                   | ZWF1              | 1 | 1 | 3 NaN    | 3834800  |
| P11633                   | NHP6B             | 1 | 1 | 8.1 NaN  | 0        |
| P11655                   | SEC12             | 1 | 1 | 3.4 NaN  | 0        |
| P11709                   | BIK1              | 1 | 1 | 4.5 NaN  | 2813300  |
| P11972                   | SST2              | 1 | 1 | 1.1 NaN  | 23056000 |
| P12688                   | YPK1              | 1 | 1 | 2.2 NaN  | 1658600  |
| P12754                   | GCD2              | 1 | 1 | 2.2 NaN  | 8154400  |
| P13186                   | KIN2              | 1 | 1 | 0.7 NaN  | 1460900  |
| P13393                   | SPT15             | 1 | 1 | 4.2 NaN  | 2314200  |
| P13517                   | CAP2              | 1 | 1 | 4.5 NaN  | 0        |

|               |            |   |   |          |          |
|---------------|------------|---|---|----------|----------|
| P13574        | STE12      | 1 | 1 | 3.3 NaN  | 2376800  |
| P13663        | HOM2       | 1 | 1 | 2.2 NaN  | 5546300  |
| P14742        | GFA1       | 1 | 1 | 2.2 NaN  | 7075800  |
| P15424        | MSS116     | 2 | 2 | 5.1 NaN  | 4245400  |
| P15496        | IDI1       | 1 | 1 | 5.6 NaN  | 3405800  |
| P15624        | FRS1       | 2 | 2 | 4.5 NaN  | 2895900  |
| P15790        | CKA1       | 1 | 1 | 2.4 NaN  | 5068500  |
| P16622        | HEM15      | 2 | 2 | 8.4 NaN  | 28050000 |
| P16661        | ALG1       | 1 | 1 | 4.9 NaN  | 6326300  |
| P17064        | FCY2       | 2 | 2 | 4.9 NaN  | 36241000 |
| P17065        | SEC2       | 1 | 1 | 1.6 NaN  | 3145700  |
| P17214        | EST1       | 1 | 1 | 1.1 NaN  | 6198100  |
| P17898        | CPT1       | 1 | 1 | 3.3 NaN  | 8410100  |
| P18408        | MET16      | 1 | 1 | 3.4 NaN  | 25690000 |
| P18562        | FUR1       | 1 | 1 | 6 NaN    | 7422000  |
| P18899        | DDR48      | 1 | 1 | 3.3 NaN  | 20091000 |
| P18900        | COQ1       | 1 | 1 | 1.5 NaN  | 4918800  |
| P20053        | PRP4       | 1 | 1 | 3 NaN    | 8406500  |
| P20081        | FPR1       | 1 | 1 | 15.8 NaN | 7530200  |
| P20107        | ZRC1       | 1 | 1 | 1.4 NaN  | 3127600  |
| P20449        | DBP5       | 1 | 1 | 2.7 NaN  | 2017000  |
| P20484        | MAK11      | 1 | 1 | 7.5 NaN  | 5535200  |
| P20604        | SIT4       | 1 | 1 | 3.2 NaN  | 6124600  |
| P21147        | OLE1       | 3 | 3 | 10 NaN   | 16114000 |
| P21264        | ADE2       | 1 | 1 | 2.1 NaN  | 2386500  |
| P21524        | RNR1       | 1 | 1 | 2 NaN    | 3920100  |
| P32328;P22204 | DBF20;DBF2 | 1 | 1 | 1.1 NaN  | 2748200  |
| P22336        | RFA1       | 1 | 1 | 1.4 NaN  | 7464300  |
| P22515        | UBA1       | 1 | 1 | 2.4 NaN  | 1941600  |
| P23180        | AIM17      | 1 | 1 | 2.6 NaN  | 2985600  |
| P23291        | YCK1       | 1 | 1 | 3 NaN    | 10653000 |
| P23369        | MRPL25     | 2 | 2 | 18.5 NaN | 1786500  |
| P23561        | STE11      | 1 | 1 | 1.4 NaN  | 4576500  |

|        |       |   |   |          |           |
|--------|-------|---|---|----------|-----------|
| P23638 | PRE9  | 2 | 2 | 9.3 NaN  | 21995000  |
| P23641 | MIR1  | 2 | 2 | 10.6 NaN | 2568000   |
| P24521 | ERG8  | 1 | 1 | 3.3 NaN  | 5092500   |
| P24783 | DBP2  | 1 | 1 | 1.5 NaN  | 36320000  |
| P25355 | CTR86 | 1 | 1 | 1.6 NaN  | 3195600   |
| P25358 | ELO2  | 1 | 1 | 2.9 NaN  | 117810000 |
| P25372 | TRX3  | 1 | 1 | 8.7 NaN  | 5535100   |
| P25373 | GRX1  | 1 | 1 | 11.8 NaN | 13572000  |
| P25379 | CHA1  | 1 | 1 | 2.5 NaN  | 4951100   |
| P25441 | RPC53 | 1 | 1 | 1.9 NaN  | 12445000  |
| P25560 | RER1  | 1 | 1 | 4.8 NaN  | 59326000  |
| P25626 | IMG1  | 1 | 1 | 9.5 NaN  | 2594600   |
| P25628 | ARE1  | 1 | 1 | 1.6 NaN  | 2368700   |
| P25635 | PWP2  | 1 | 1 | 0.9 NaN  | 6748100   |
| P25642 | IMG2  | 1 | 1 | 6.2 NaN  | 7798100   |
| P25808 | SPB4  | 1 | 1 | 1.8 NaN  | 3821000   |
| P28495 | CAP1  | 2 | 2 | 10.4 NaN | 6700000   |
| P29952 | PMI40 | 1 | 1 | 2.8 NaN  | 5830900   |
| P30656 | PRE2  | 1 | 1 | 4.5 NaN  | 9506600   |
| P31109 | SNC1  | 1 | 1 | 10.3 NaN | 4011100   |
| P31111 | ZIP1  | 1 | 1 | 1 NaN    | 7861100   |
| P31373 | CYS3  | 1 | 1 | 3.3 NaN  | 3770900   |
| P31382 | PMT2  | 1 | 1 | 2.2 NaN  | 5284900   |
| P32331 | YMC1  | 1 | 1 | 7.5 NaN  | 6226100   |
| P32333 | MOT1  | 1 | 1 | 0.6 NaN  | 2683900   |
| P32337 | PSE1  | 1 | 1 | 1.7 NaN  | 5632900   |
| P32352 | ERG2  | 1 | 1 | 5.4 NaN  | 2788400   |
| P32387 | MRP20 | 1 | 1 | 5.3 NaN  | 5359000   |
| P32458 | CDC11 | 1 | 1 | 5.3 NaN  | 3741200   |
| P32476 | ERG1  | 1 | 1 | 2 NaN    | 13286000  |
| P32487 | LYP1  | 1 | 1 | 1.5 NaN  | 3315100   |
| P32525 | ECM25 | 1 | 1 | 1.8 NaN  | 2858100   |
| P32598 | GLC7  | 1 | 1 | 3.8 NaN  | 20668000  |

|        |         |   |   |          |          |
|--------|---------|---|---|----------|----------|
| P32602 | SEC17   | 1 | 1 | 5.1 NaN  | 9224800  |
| P32610 | VMA8    | 1 | 1 | 3.9 NaN  | 23294000 |
| P32618 |         | 1 | 1 | 1.5 NaN  | 3296200  |
| P32621 | GDA1    | 1 | 1 | 2.1 NaN  | 6043100  |
| P32629 | ANP1    | 1 | 1 | 2.2 NaN  | 0        |
| P32642 | GRX4    | 1 | 1 | 2.9 NaN  | 2867600  |
| P32644 | ECM32   | 1 | 1 | 0.9 NaN  | 3476100  |
| P32767 | KAP122  | 1 | 1 | 1.8 NaN  | 14916000 |
| P32770 | NRP1    | 1 | 1 | 1.7 NaN  | 4100800  |
| P32783 | ABD1    | 1 | 1 | 1.8 NaN  | 4719700  |
| P32784 | SCT1    | 2 | 2 | 2.4 NaN  | 6482200  |
| P32802 | EMP70   | 1 | 1 | 3.9 NaN  | 3721400  |
| P32804 | ZRT1    | 1 | 1 | 3.5 NaN  | 4027700  |
| P32805 | FZF1    | 1 | 1 | 3.7 NaN  | 3751700  |
| P32806 | GYP6    | 1 | 1 | 2.8 NaN  | 5066200  |
| P32831 | NGR1    | 1 | 1 | 1.5 NaN  | 5607900  |
| P32839 | BCS1    | 1 | 1 | 2.9 NaN  | 3307500  |
| P32860 | NFU1    | 1 | 1 | 4.3 NaN  | 5205300  |
| P32867 | SSO1    | 2 | 1 | 11.4 NaN | 7635100  |
| P32875 | LIP5    | 1 | 1 | 3.9 NaN  | 1491100  |
| P32892 | DRS1    | 2 | 2 | 3.7 NaN  | 6212100  |
| P32897 | TIM23   | 1 | 1 | 8.6 NaN  | 22986000 |
| P32901 | PTR2    | 2 | 1 | 2.8 NaN  | 1882500  |
| P32904 | MRPL6   | 2 | 2 | 11.7 NaN | 4005300  |
| P32910 | RPC34   | 2 | 2 | 7.6 NaN  | 5828700  |
| P32915 | SEC61   | 1 | 1 | 2.1 NaN  | 0        |
| P33203 | PRP40   | 1 | 1 | 2.1 NaN  | 2395900  |
| P33324 | YKL091C | 1 | 1 | 3.2 NaN  | 5566200  |
| P33328 | SNC2    | 1 | 1 | 10.4 NaN | 11919000 |
| P33330 | SER1    | 1 | 1 | 7.3 NaN  | 3552600  |
| P33891 | TIP20   | 2 | 2 | 3.1 NaN  | 4558600  |
| P34163 | TGL1    | 1 | 1 | 3.6 NaN  | 7163100  |
| P34222 | PTH2    | 1 | 1 | 5.3 NaN  | 7213600  |

|        |         |   |   |          |           |
|--------|---------|---|---|----------|-----------|
| P34223 | SHP1    | 1 | 1 | 3.3 NaN  | 0         |
| P34761 | WHI3    | 1 | 1 | 1.7 NaN  | 16299000  |
| P34909 | MOT2    | 2 | 2 | 5.5 NaN  | 8610800   |
| P35178 | RRP1    | 1 | 1 | 2.2 NaN  | 3535200   |
| P35179 | SSS1    | 1 | 1 | 22.5 NaN | 261400000 |
| P35180 | TOM20   | 1 | 1 | 6 NaN    | 30908000  |
| P35728 | MPE1    | 1 | 1 | 1.8 NaN  | 0         |
| P35729 | NUP120  | 1 | 1 | 1 NaN    | 3100200   |
| P36013 | MAE1    | 1 | 1 | 2.2 NaN  | 15283000  |
| P36016 | LHS1    | 3 | 3 | 4.4 NaN  | 8786100   |
| P36027 | MID2    | 1 | 1 | 3.7 NaN  | 0         |
| P36037 | DOA1    | 1 | 1 | 1.1 NaN  | 11000000  |
| P36039 | EMC3    | 1 | 1 | 4 NaN    | 1738700   |
| P36046 | MIA40   | 1 | 1 | 3.5 NaN  | 2360100   |
| P36068 | SHE2    | 1 | 1 | 10.2 NaN | 9556500   |
| P36078 | HOT13   | 1 | 1 | 7.8 NaN  | 2572700   |
| P36100 | TFA1    | 1 | 1 | 2.3 NaN  | 3230000   |
| P36101 | TCD2    | 1 | 1 | 2.2 NaN  | 3275300   |
| P36102 | PAN3    | 1 | 1 | 1.8 NaN  | 0         |
| P36114 | YKR018C | 2 | 2 | 3.4 NaN  | 2832100   |
| P36121 | RPC37   | 1 | 1 | 5.3 NaN  | 3268400   |
| P36130 | CAF4    | 1 | 1 | 2.2 NaN  | 2954800   |
| P36135 | UTH1    | 1 | 1 | 2.2 NaN  | 12178000  |
| P36165 | TGL4    | 1 | 1 | 1.5 NaN  | 0         |
| P36517 | MRPL4   | 1 | 1 | 4.1 NaN  | 4785200   |
| P36519 | MRPL7   | 1 | 1 | 3.4 NaN  | 10237000  |
| P36520 | MRPL10  | 1 | 1 | 4.3 NaN  | 3228000   |
| P36521 | MRPL11  | 1 | 1 | 4 NaN    | 5076300   |
| P37012 | PGM2    | 2 | 1 | 5.4 NaN  | 0         |
| P37263 |         | 2 | 2 | 15 NaN   | 3378100   |
| P37303 | GLY1    | 1 | 1 | 2.8 NaN  | 14462000  |
| P37370 | VRP1    | 1 | 1 | 2.7 NaN  | 4212700   |
| P38009 | ADE17   | 1 | 1 | 4.2 NaN  | 3635200   |



|               |           |   |   |          |          |
|---------------|-----------|---|---|----------|----------|
| P38068        | GRX7      | 1 | 1 | 3.9 NaN  | 1345100  |
| P38070        | YPK3      | 1 | 1 | 1.7 NaN  | 2440900  |
| P38080        | AKL1      | 1 | 1 | 1.1 NaN  | 0        |
| P38085        | TAT1      | 1 | 1 | 1.1 NaN  | 11172000 |
| P38087        | YMC2      | 1 | 1 | 7 NaN    | 2765200  |
| P38088        | GRS1      | 2 | 2 | 2.6 NaN  | 11992000 |
| P38109        |           | 1 | 1 | 2 NaN    | 4499600  |
| P38116        | ARL1      | 1 | 1 | 4.4 NaN  | 16113000 |
| P38143;P40581 | GPX2;HYR1 | 1 | 1 | 6.2 NaN  | 4779300  |
| P38181        | NUP170    | 1 | 1 | 0.8 NaN  | 6148200  |
| P38193        | PSY4      | 1 | 1 | 2.9 NaN  | 3452800  |
| P38210        | LDB7      | 1 | 1 | 12.8 NaN | 2707300  |
| P38226        | CST26     | 1 | 1 | 5.3 NaN  | 6805200  |
| P38237        | UBP14     | 1 | 1 | 1.7 NaN  | 2077700  |
| P38244        | PFF1      | 1 | 1 | 1.3 NaN  | 0        |
| P38247        | SLM4      | 1 | 1 | 8 NaN    | 6213100  |
| P38248        | ECM33     | 1 | 1 | 1.6 NaN  | 63450000 |
| P38254        | PBY1      | 1 | 1 | 1.5 NaN  | 4612200  |
| P38255        | RXT2      | 1 | 1 | 3.7 NaN  | 4559300  |
| P38273        | CCZ1      | 1 | 1 | 1.7 NaN  | 2329700  |
| P38310        | FTH1      | 1 | 1 | 1.7 NaN  | 3154200  |
| P38325        | OM14      | 1 | 1 | 14.9 NaN | 1095400  |
| P38331        |           | 1 | 1 | 4.6 NaN  | 0        |
| P38351        | PAF1      | 2 | 2 | 7.9 NaN  | 5619400  |
| P38427        | TSL1      | 1 | 1 | 2.3 NaN  | 1909100  |
| P38428        | CUE1      | 1 | 1 | 7.4 NaN  | 6782500  |
| P38429        | SAP30     | 1 | 1 | 10.4 NaN | 4117400  |
| P38624        | PRE3      | 1 | 1 | 7.4 NaN  | 0        |
| P38736        | GOS1      | 1 | 1 | 6.3 NaN  | 13417000 |
| P38753        | HSE1      | 1 | 1 | 1.8 NaN  | 2767800  |
| P38771        | RRF1      | 1 | 1 | 4.8 NaN  | 0        |
| P38784        | VMA22     | 1 | 1 | 3.9 NaN  | 14217000 |
| P38791        | DYS1      | 1 | 1 | 2.8 NaN  | 2842800  |

|        |         |   |   |          |          |
|--------|---------|---|---|----------|----------|
| P38814 | SBE22   | 1 | 1 | 1.4 NaN  | 2505500  |
| P38828 | LSM12   | 1 | 1 | 4.8 NaN  | 13730000 |
| P38829 | YHR122W | 1 | 1 | 5.2 NaN  | 9292900  |
| P38833 | YHR127W | 1 | 1 | 8.2 NaN  | 7691800  |
| P38874 | IKI1    | 1 | 1 | 3.2 NaN  | 3712900  |
| P38911 | FPR3    | 2 | 1 | 9 NaN    | 31601000 |
| P38922 | HRB1    | 1 | 1 | 2.6 NaN  | 4987300  |
| P38929 | PMC1    | 1 | 1 | 1.7 NaN  | 3943100  |
| P38962 | TVP23   | 1 | 1 | 5 NaN    | 12174000 |
| P38966 |         | 3 | 3 | 4.1 NaN  | 6349000  |
| P38989 | SMC2    | 1 | 1 | 0.7 NaN  | 2284400  |
| P38999 | LYS9    | 1 | 1 | 2.2 NaN  | 3915600  |
| P39008 | POP2    | 1 | 1 | 3 NaN    | 13222000 |
| P39012 | GAA1    | 1 | 1 | 3.3 NaN  | 2065700  |
| P39013 | END3    | 1 | 1 | 4 NaN    | 0        |
| P39102 | XDJ1    | 1 | 1 | 4.4 NaN  | 6290900  |
| P39107 | MNN9    | 2 | 1 | 4.3 NaN  | 7331100  |
| P39522 | ILV3    | 2 | 2 | 7.2 NaN  | 10949000 |
| P39531 | RCY1    | 2 | 2 | 2.4 NaN  | 3311500  |
| P39705 | NUP60   | 2 | 2 | 5 NaN    | 5290200  |
| P39715 | ECM1    | 2 | 2 | 11.8 NaN | 5762300  |
| P39719 | FLC2    | 1 | 1 | 1.1 NaN  | 9590100  |
| P39729 | RBG1    | 1 | 1 | 3.8 NaN  | 3871800  |
| P39731 | MTW1    | 1 | 1 | 3.8 NaN  | 15105000 |
| P39742 | SEC72   | 1 | 1 | 5.2 NaN  | 5208300  |
| P39925 | AFG3    | 1 | 1 | 1.8 NaN  | 0        |
| P39940 | RSP5    | 2 | 2 | 4.8 NaN  | 20219000 |
| P39960 | BEM2    | 1 | 1 | 0.5 NaN  | 1875400  |
| P39968 | VAC8    | 1 | 1 | 1.7 NaN  | 5230300  |
| P40013 | BIM1    | 1 | 1 | 4.7 NaN  | 6532500  |
| P40015 | ISC1    | 1 | 1 | 3.8 NaN  | 4154600  |
| P40030 | ERG28   | 1 | 1 | 8.1 NaN  | 12120000 |
| P40052 | YER079W | 1 | 1 | 4.3 NaN  | 3566600  |

|               |            |   |   |          |           |
|---------------|------------|---|---|----------|-----------|
| P40510;P40054 | SER33;SER3 | 1 | 1 | 3.2 NaN  | 0         |
| P40059        | DOT6       | 1 | 1 | 2.1 NaN  | 3247100   |
| P40066        | GLE2       | 1 | 1 | 5.5 NaN  | 10022000  |
| P40088        | FTR1       | 1 | 1 | 2.2 NaN  | 14897000  |
| P40089        | LSM5       | 1 | 1 | 7.5 NaN  | 0         |
| P40091        | PEA2       | 1 | 1 | 4 NaN    | 8465400   |
| P40159        |            | 1 | 1 | 8 NaN    | 1952600   |
| P40208        | GID8       | 1 | 1 | 2.9 NaN  | 2292900   |
| P40210        | SIP5       | 2 | 2 | 3.7 NaN  | 5978000   |
| P40212        | RPL13B     | 1 | 1 | 4.5 NaN  | 3788000   |
| P40218        |            | 1 | 1 | 4.9 NaN  | 2319100   |
| P40219        | OSW5       | 1 | 1 | 18.9 NaN | 2069000   |
| P40303        | PRE6       | 1 | 1 | 12.6 NaN | 2485700   |
| P40312        | CYB5       | 1 | 1 | 7.5 NaN  | 8979300   |
| P40318        | SSM4       | 2 | 2 | 1.5 NaN  | 4176400   |
| P40340        | YTA7       | 1 | 1 | 0.6 NaN  | 101640000 |
| Q05164;P40442 | HPF1       | 1 | 1 | 0.8 NaN  | 6728000   |
| P40452        | COA1       | 1 | 1 | 4.6 NaN  | 4553400   |
| P40470        | RRT14      | 1 | 1 | 3.9 NaN  | 4761400   |
| P40472        | SIM1       | 1 | 1 | 1.5 NaN  | 0         |
| P40513        | MAM33      | 1 | 1 | 3.4 NaN  | 6185800   |
| P40532        | APQ12      | 1 | 1 | 10.9 NaN | 2503800   |
| P40535        | CST6       | 1 | 1 | 2.2 NaN  | 3106900   |
| P40555        | NAS2       | 1 | 1 | 4.5 NaN  | 6810000   |
| P40561        | SGN1       | 3 | 3 | 14.8 NaN | 9247900   |
| P40573        | MET28      | 1 | 1 | 4.3 NaN  | 24090000  |
| P40850        | MKT1       | 1 | 1 | 2.5 NaN  | 6497000   |
| P40858        | MRPL49     | 1 | 1 | 8.7 NaN  | 15209000  |
| P40959        | MVP1       | 1 | 1 | 1.4 NaN  | 1451000   |
| P40970        | LCB2       | 2 | 2 | 5 NaN    | 49489000  |
| P41057        | RPS29A     | 1 | 1 | 14.3 NaN | 126190000 |
| P41058        | RPS29B     | 1 | 1 | 14.3 NaN | 8349300   |
| P41812        | POP1       | 1 | 1 | 1.3 NaN  | 2113300   |

|        |         |   |   |          |           |
|--------|---------|---|---|----------|-----------|
| P42838 | LEM3    | 1 | 1 | 2.7 NaN  | 7030000   |
| P42938 | TDA10   | 1 | 1 | 6.6 NaN  | 4267900   |
| P43557 | FMP32   | 1 | 1 | 3.4 NaN  | 19787000  |
| P43558 | OTU1    | 1 | 1 | 4.3 NaN  | 2963500   |
| P43560 | YFL042C | 1 | 1 | 2.8 NaN  | 7824200   |
| P43561 | FET5    | 1 | 1 | 2.9 NaN  | 5366500   |
| P43574 | GAT1    | 1 | 1 | 2 NaN    | 4611200   |
| P43589 | SAD1    | 1 | 1 | 4.2 NaN  | 205910000 |
| P43597 | YFR016C | 1 | 1 | 1.1 NaN  | 4608700   |
| P43616 | DUG1    | 3 | 3 | 7.9 NaN  | 20423000  |
| P43636 | ALG2    | 1 | 1 | 4.4 NaN  | 2915900   |
| P46654 | RPS0B   | 1 | 1 | 7.1 NaN  | 14458000  |
| P46671 | FAR3    | 1 | 1 | 7.8 NaN  | 2727700   |
| P46673 | NUP85   | 1 | 1 | 1.7 NaN  | 4018000   |
| P46951 | YPP1    | 1 | 1 | 1.1 NaN  | 2245100   |
| P46982 | MNN5    | 1 | 1 | 1.4 NaN  | 967520    |
| P47019 | ALB1    | 1 | 1 | 6.3 NaN  | 16275000  |
| P47035 | NET1    | 1 | 1 | 1.6 NaN  | 5128400   |
| P47044 |         | 1 | 1 | 6.5 NaN  | 3775700   |
| P47064 | APS3    | 1 | 1 | 4.6 NaN  | 22055000  |
| P47075 | VTC4    | 1 | 1 | 1.2 NaN  | 6900700   |
| P47112 | TAH11   | 1 | 1 | 2.2 NaN  | 2913500   |
| P47127 | AIM24   | 1 | 1 | 3 NaN    | 2298000   |
| P47129 | ACF4    | 1 | 1 | 4.9 NaN  | 2353700   |
| P47133 | EMC2    | 1 | 1 | 3.4 NaN  | 13847000  |
| P47143 | ADO1    | 1 | 1 | 5 NaN    | 4180600   |
| P47150 | RSM7    | 1 | 1 | 4.9 NaN  | 0         |
| P47154 | STE24   | 1 | 1 | 2.6 NaN  | 2634900   |
| P47818 | CCC1    | 1 | 1 | 2.8 NaN  | 20987000  |
| P47822 | SRB7    | 1 | 1 | 12.9 NaN | 12751000  |
| P48240 | MTR3    | 1 | 1 | 5.2 NaN  | 2642400   |
| P48362 | HGH1    | 1 | 1 | 3.8 NaN  | 3780100   |
| P48510 | DSK2    | 1 | 1 | 5.4 NaN  | 7271800   |

|        |         |   |   |          |          |
|--------|---------|---|---|----------|----------|
| P48563 | MON2    | 1 | 1 | 0.7 NaN  | 7360900  |
| P49095 | GCV2    | 1 | 1 | 1.1 NaN  | 2968000  |
| P49367 | LYS4    | 1 | 1 | 1 NaN    | 7302700  |
| P49687 | NUP145  | 1 | 1 | 1.4 NaN  | 4284600  |
| P49960 | PRP24   | 1 | 1 | 1.6 NaN  | 1631200  |
| P50101 | UBP15   | 2 | 2 | 1.9 NaN  | 3874500  |
| P50102 | UBP8    | 1 | 1 | 2.1 NaN  | 2693800  |
| P50106 | RPA14   | 1 | 1 | 14.6 NaN | 4396000  |
| P50107 | GLO1    | 1 | 1 | 4.9 NaN  | 0        |
| P50110 | SAM37   | 1 | 1 | 3.7 NaN  | 1891000  |
| P50945 | MIC27   | 1 | 1 | 4.7 NaN  | 10155000 |
| P51998 | YML6    | 2 | 2 | 11.9 NaN | 8208700  |
| P52553 | YKE2    | 2 | 2 | 25.4 NaN | 2908400  |
| P52870 | SBH1    | 1 | 1 | 12.2 NaN | 14558000 |
| P52891 | NUP84   | 1 | 1 | 1.9 NaN  | 2312900  |
| P52910 | ACS2    | 1 | 1 | 1.3 NaN  | 799150   |
| P52920 | NBP35   | 1 | 1 | 5.8 NaN  | 7089100  |
| P53036 | SAP4    | 1 | 1 | 2.3 NaN  | 1532000  |
| P53045 | ERG25   | 1 | 1 | 4.2 NaN  | 11470000 |
| P53049 | YOR1    | 2 | 2 | 1.2 NaN  | 5936500  |
| P53063 | RAI1    | 1 | 1 | 1.6 NaN  | 1481600  |
| P53064 | RTF1    | 2 | 2 | 3.8 NaN  | 4164300  |
| P53073 | EMC4    | 1 | 1 | 5.3 NaN  | 6940400  |
| P53076 | VID30   | 1 | 1 | 1 NaN    | 2411100  |
| P53080 | EDC1    | 1 | 1 | 4 NaN    | 4422800  |
| P53091 | MCM6    | 1 | 1 | 1.3 NaN  | 9531200  |
| P53108 | YIP5    | 1 | 1 | 3.5 NaN  | 6431100  |
| P53119 | HUL5    | 1 | 1 | 1.5 NaN  | 2634100  |
| P53131 | PRP43   | 1 | 1 | 0.8 NaN  | 20280000 |
| P53133 | YGL117W | 1 | 1 | 3 NaN    | 6606200  |
| P53144 | YGL101W | 1 | 1 | 4.7 NaN  | 7076700  |
| P53169 | YBP2    | 1 | 1 | 3 NaN    | 3469300  |
| P53184 | PNC1    | 1 | 1 | 9.3 NaN  | 5540200  |

|        |         |   |   |          |           |
|--------|---------|---|---|----------|-----------|
| P53199 | ERG26   | 1 | 1 | 2.9 NaN  | 34192000  |
| P53220 | TIM21   | 1 | 1 | 4.2 NaN  | 5166800   |
| P53235 | YGR054W | 1 | 1 | 3.4 NaN  | 6989100   |
| P53251 | SLX9    | 1 | 1 | 7.6 NaN  | 5882800   |
| P53262 | VOA1    | 1 | 1 | 3.4 NaN  | 12286000  |
| P53290 | GTR2    | 1 | 1 | 2.6 NaN  | 11584000  |
| P53322 | TNA1    | 1 | 1 | 2.4 NaN  | 5703400   |
| P53324 | SAY1    | 1 | 1 | 3.8 NaN  | 9666600   |
| P53326 | YGR266W | 1 | 1 | 2.1 NaN  | 7667100   |
| P53332 | CAB4    | 1 | 1 | 3.6 NaN  | 3656300   |
| P53334 | SCW4    | 1 | 1 | 2.8 NaN  | 3407300   |
| P53337 | ERV29   | 1 | 1 | 3.9 NaN  | 13247000  |
| P53507 | TOM7    | 1 | 1 | 21.7 NaN | 14323000  |
| P53551 | HHO1    | 1 | 1 | 4.3 NaN  | 7266400   |
| P53633 | YIP3    | 1 | 1 | 5.1 NaN  | 4664400   |
| P53738 | TRM112  | 2 | 2 | 15.6 NaN | 9039200   |
| P53852 |         | 1 | 1 | 1.6 NaN  | 5413400   |
| P53855 | ATG2    | 1 | 1 | 0.5 NaN  | 3880700   |
| P53874 | UBP10   | 1 | 1 | 1.1 NaN  | 3368400   |
| P53878 |         | 1 | 1 | 3.4 NaN  | 104170000 |
| P53890 | BNI5    | 1 | 1 | 5.8 NaN  | 1986900   |
| P53899 | CUZ1    | 1 | 1 | 5.5 NaN  | 7271200   |
| P53905 | LSM7    | 1 | 1 | 6.1 NaN  | 21137000  |
| P53909 | AAH1    | 2 | 2 | 6.3 NaN  | 685150    |
| P53935 | NST1    | 1 | 1 | 0.6 NaN  | 1162100   |
| P53946 | ARP5    | 1 | 1 | 1.5 NaN  | 3666200   |
| P53951 | COG5    | 1 | 1 | 1.7 NaN  | 6705700   |
| P54791 | ORC4    | 1 | 1 | 1.9 NaN  | 1795500   |
| P54858 | DOS2    | 1 | 1 | 2.9 NaN  | 1503800   |
| Q00245 | RHO3    | 1 | 1 | 5.6 NaN  | 3381300   |
| Q00764 | TPS1    | 1 | 1 | 2.4 NaN  | 17310000  |
| Q00776 | APM1    | 1 | 1 | 1.9 NaN  | 0         |
| Q00816 | REG1    | 1 | 1 | 1.3 NaN  | 5399900   |

|        |         |   |   |          |           |
|--------|---------|---|---|----------|-----------|
| Q01649 | CIK1    | 1 | 1 | 1.5 NaN  | 225400000 |
| Q01722 | GCR2    | 1 | 1 | 2.4 NaN  | 3509000   |
| Q02206 | RSC4    | 1 | 1 | 1.8 NaN  | 2338700   |
| Q02486 | ABF2    | 2 | 2 | 11.5 NaN | 4921100   |
| Q02554 | CUS1    | 1 | 1 | 2.8 NaN  | 1431100   |
| Q02725 | VTC3    | 1 | 1 | 1.6 NaN  | 6200000   |
| Q02774 | SHR3    | 1 | 1 | 7.1 NaN  | 13606000  |
| Q02784 | GRX5    | 1 | 1 | 11.3 NaN | 10327000  |
| Q02795 | SWP1    | 1 | 1 | 5.9 NaN  | 12790000  |
| Q02796 | LGE1    | 1 | 1 | 3.6 NaN  | 2372900   |
| Q02820 | NCE101  | 1 | 1 | 18.9 NaN | 3237000   |
| Q02908 | ELP3    | 1 | 1 | 2.2 NaN  | 7535400   |
| Q02939 | TFB2    | 1 | 1 | 2.1 NaN  | 4340100   |
| Q03020 | ISU1    | 1 | 1 | 7.3 NaN  | 5799500   |
| Q03048 | COF1    | 1 | 1 | 7 NaN    | 2755900   |
| Q03177 |         | 1 | 1 | 2.3 NaN  | 2848500   |
| Q03290 | TFB3    | 1 | 1 | 3.1 NaN  | 4597600   |
| Q03327 | UGO1    | 1 | 1 | 2.2 NaN  | 4174300   |
| Q03337 | TRS31   | 1 | 1 | 3.9 NaN  | 5073600   |
| Q03362 | YDR476C | 2 | 2 | 9.8 NaN  | 1714000   |
| Q03370 | PEX29   | 1 | 1 | 2 NaN    | 1397000   |
| Q03579 | LIP1    | 1 | 1 | 6.7 NaN  | 2974000   |
| Q03654 | CEF1    | 1 | 1 | 2.4 NaN  | 3842800   |
| Q03655 | GAS3    | 1 | 1 | 3.4 NaN  | 2353900   |
| Q03735 | NAB6    | 2 | 2 | 2.5 NaN  | 6229300   |
| Q03750 | TAF8    | 1 | 1 | 2.4 NaN  | 2043800   |
| Q03769 | ENT5    | 1 | 1 | 3.2 NaN  | 5556600   |
| Q03771 | YDR161W | 2 | 2 | 7.5 NaN  | 11430000  |
| Q03780 | YDR239C | 1 | 1 | 2.4 NaN  | 3910600   |
| Q03784 | TRS23   | 1 | 1 | 4.6 NaN  | 7512900   |
| Q03834 | MSH6    | 1 | 1 | 0.6 NaN  | 15812000  |
| Q03835 | GRX3    | 1 | 1 | 4.8 NaN  | 9132000   |
| Q03897 | MTC5    | 1 | 1 | 0.8 NaN  | 2286400   |

|        |         |   |   |          |          |
|--------|---------|---|---|----------|----------|
| Q03921 | DOP1    | 2 | 2 | 1.4 NaN  | 1895100  |
| Q04067 | TIF35   | 1 | 1 | 9.5 NaN  | 21880000 |
| Q04080 | GPI17   | 2 | 2 | 4.3 NaN  | 7779400  |
| Q04213 | IOC4    | 1 | 1 | 1.9 NaN  | 7552600  |
| Q04226 | TAF11   | 2 | 2 | 4.9 NaN  | 1555900  |
| Q04305 | UTP15   | 2 | 2 | 4.9 NaN  | 10608000 |
| Q04410 | GRH1    | 1 | 1 | 3.5 NaN  | 2101300  |
| Q04472 | MGR3    | 2 | 2 | 4.8 NaN  | 3525200  |
| Q04599 | MRPL1   | 2 | 2 | 9.1 NaN  | 7897200  |
| Q04636 | POB3    | 2 | 2 | 4.3 NaN  | 4586200  |
| Q04728 | ARG7    | 1 | 1 | 3.2 NaN  | 5462100  |
| Q04773 |         | 1 | 1 | 7.6 NaN  | 2687900  |
| Q04868 | ELP6    | 1 | 1 | 2.9 NaN  | 7965900  |
| Q04934 | IVY1    | 1 | 1 | 4.9 NaN  | 8521700  |
| Q04951 | SCW10   | 1 | 1 | 2.6 NaN  | 2947700  |
| Q04958 | NTE1    | 1 | 1 | 0.7 NaN  | 1154700  |
| Q05021 | TAF7    | 1 | 1 | 2.4 NaN  | 979740   |
| Q05123 | ARP9    | 1 | 1 | 1.9 NaN  | 0        |
| Q05530 | YDR286C | 1 | 1 | 11.4 NaN | 4275200  |
| Q05580 | HEL2    | 2 | 2 | 3.4 NaN  | 2988900  |
| Q05636 | RRP45   | 1 | 1 | 4.3 NaN  | 0        |
| Q05933 | ARC18   | 1 | 1 | 5.6 NaN  | 16003000 |
| Q05948 | YLR225C | 1 | 1 | 3.4 NaN  | 5598100  |
| Q06005 | LIP2    | 1 | 1 | 2.7 NaN  | 6015400  |
| Q06102 | YTH1    | 1 | 1 | 4.3 NaN  | 5469400  |
| Q06146 | YLR257W | 1 | 1 | 5.6 NaN  | 8645900  |
| Q06217 | SMD2    | 1 | 1 | 8.2 NaN  | 3805400  |
| Q06336 | GGA1    | 1 | 1 | 1.8 NaN  | 3990900  |
| Q06405 | ATP17   | 1 | 1 | 10.9 NaN | 16294000 |
| Q06451 | TPO3    | 1 | 1 | 2.1 NaN  | 5000700  |
| Q06505 | SPN1    | 1 | 1 | 2.9 NaN  | 1432300  |
| Q06522 | YPR147C | 1 | 1 | 3.3 NaN  | 0        |
| Q06523 | YPR148C | 1 | 1 | 2.5 NaN  | 5779100  |



|        |         |   |   |          |          |
|--------|---------|---|---|----------|----------|
| Q06639 | RSC3    | 2 | 2 | 2.6 NaN  | 2319900  |
| Q06668 | OMS1    | 1 | 1 | 3.8 NaN  | 3625600  |
| Q06672 | TSR2    | 1 | 1 | 3.9 NaN  | 3038900  |
| Q06689 | YLR413W | 1 | 1 | 1.8 NaN  | 4455500  |
| Q06697 | CDC73   | 1 | 1 | 2.5 NaN  | 11898000 |
| Q06708 | VAC14   | 2 | 2 | 2.8 NaN  | 15590000 |
| Q06709 | REH1    | 2 | 2 | 6.5 NaN  | 5816700  |
| Q07381 | TSR1    | 1 | 1 | 1.6 NaN  | 2907900  |
| Q07458 | RXT3    | 1 | 1 | 6.1 NaN  | 3888800  |
| Q07528 | ATG20   | 1 | 1 | 1.9 NaN  | 3125500  |
| Q07623 | NOP6    | 1 | 1 | 6.7 NaN  | 1111800  |
| Q07648 | DTD1    | 1 | 1 | 5.3 NaN  | 5070900  |
| Q07655 | WHI4    | 1 | 1 | 3.7 NaN  | 4626700  |
| Q07716 | AIM6    | 1 | 1 | 5.1 NaN  | 4206700  |
| Q07872 | ENT4    | 1 | 1 | 4 NaN    | 1657900  |
| Q07914 | PAM18   | 1 | 1 | 8.9 NaN  | 18240000 |
| Q07979 | RSC58   | 1 | 1 | 1.6 NaN  | 4678400  |
| Q08001 | YLR072W | 2 | 2 | 3.8 NaN  | 5913700  |
| Q08096 | RCL1    | 1 | 1 | 2.5 NaN  | 2434800  |
| Q08193 | GAS5    | 1 | 1 | 1.7 NaN  | 15559000 |
| Q08204 | SMC5    | 1 | 1 | 1 NaN    | 5807300  |
| Q08217 | PSK2    | 1 | 1 | 1.5 NaN  | 56205000 |
| Q08237 | REX4    | 1 | 1 | 2.8 NaN  | 9099300  |
| Q08282 | PPM2    | 1 | 1 | 0.9 NaN  | 12244000 |
| Q08484 | GYP1    | 1 | 1 | 1.7 NaN  | 2406900  |
| Q08492 | BUD21   | 1 | 1 | 11.7 NaN | 2040000  |
| Q08548 | ALE1    | 1 | 1 | 2.3 NaN  | 3603000  |
| Q08601 | MCA1    | 1 | 1 | 2.8 NaN  | 3666000  |
| Q08726 | GPN2    | 1 | 1 | 4 NaN    | 4461200  |
| Q08732 | HRK1    | 1 | 1 | 1.4 NaN  | 4706100  |
| Q08816 | YOR352W | 2 | 2 | 6.7 NaN  | 2604700  |
| Q08822 | CIR2    | 1 | 1 | 2.2 NaN  | 2148600  |
| Q08920 | CBC2    | 1 | 1 | 4.8 NaN  | 4043400  |

|        |         |   |   |          |          |
|--------|---------|---|---|----------|----------|
| Q08959 | PGC1    | 1 | 1 | 4 NaN    | 11660000 |
| Q08967 | FLC1    | 1 | 1 | 1.4 NaN  | 1489400  |
| Q12030 | TAF10   | 2 | 2 | 16 NaN   | 5097700  |
| Q12072 | IOC2    | 1 | 1 | 1.6 NaN  | 3477300  |
| Q12084 | DAS2    | 1 | 1 | 3.9 NaN  | 1689100  |
| Q12096 | GNT1    | 1 | 1 | 2.4 NaN  | 2009400  |
| Q12102 | CFT2    | 1 | 1 | 1 NaN    | 3881800  |
| Q12117 | MRH1    | 1 | 1 | 5.3 NaN  | 12839000 |
| Q12122 | LYS21   | 3 | 1 | 10.7 NaN | 17774000 |
| Q12149 | RRP6    | 2 | 2 | 4.2 NaN  | 17133000 |
| Q12155 |         | 1 | 1 | 5 NaN    | 734740   |
| Q12158 | MCD1    | 2 | 2 | 4.8 NaN  | 8730200  |
| Q12160 | YPR063C | 1 | 1 | 8.6 NaN  | 4472500  |
| Q12213 | RPL7B   | 8 | 1 | 41.4 NaN | 616450   |
| Q12246 | LCB4    | 1 | 1 | 1.3 NaN  | 540920   |
| Q12263 | GIN4    | 2 | 2 | 2 NaN    | 3378100  |
| Q12277 | RRP42   | 1 | 1 | 4.5 NaN  | 0        |
| Q12296 | MAM3    | 1 | 1 | 1.6 NaN  | 6971600  |
| Q12306 | SMT3    | 1 | 1 | 10.9 NaN | 12005000 |
| Q12329 | HSP42   | 1 | 1 | 2.9 NaN  | 4172300  |
| Q12339 | UTP23   | 1 | 1 | 3.5 NaN  | 3728800  |
| Q12343 | MED4    | 2 | 2 | 9.2 NaN  | 15091000 |
| Q12349 | ATP14   | 1 | 1 | 11.3 NaN | 18084000 |
| Q12363 | WTM1    | 2 | 2 | 6.2 NaN  | 4230300  |
| Q12368 | SNU23   | 1 | 1 | 6.2 NaN  | 2838000  |
| Q12382 | DGK1    | 1 | 1 | 6.9 NaN  | 8527000  |
| Q12404 | MPD1    | 1 | 1 | 3.5 NaN  | 1890100  |
| Q12432 | EAF3    | 1 | 1 | 3 NaN    | 2553200  |
| Q12436 | ZRT2    | 1 | 1 | 3.8 NaN  | 12058000 |
| Q12443 | RTN2    | 1 | 1 | 6.4 NaN  | 3471400  |
| Q12517 | DCP1    | 1 | 1 | 8.2 NaN  | 7202700  |
| Q12675 | DNF2    | 1 | 1 | 0.4 NaN  | 2092600  |
| Q12751 | RTP1    | 1 | 1 | 1.3 NaN  | 7671100  |

|        |           |   |   |          |          |
|--------|-----------|---|---|----------|----------|
| Q3E772 | YGR169C-A | 1 | 1 | 16.3 NaN | 29872000 |
| Q3E7B7 | YDL085C-A | 1 | 1 | 17.6 NaN | 1027700  |
| Q3E7C1 | TFB5      | 1 | 1 | 12.5 NaN | 7836500  |
| Q6Q560 | ISD11     | 1 | 1 | 7.4 NaN  | 10062000 |
| Q8TGU7 | YBR126W-A | 1 | 1 | 16.2 NaN | 0        |
| Q99190 | TSC13     | 1 | 1 | 3.5 NaN  | 11333000 |
| Q99271 | NHA1      | 1 | 1 | 1.6 NaN  | 0        |
| Q99287 | SEY1      | 2 | 2 | 2.8 NaN  | 5014800  |
| Q99297 | ODC2      | 1 | 1 | 3.6 NaN  | 6921200  |
| Q99369 | FSH3      | 1 | 1 | 3.4 NaN  | 3659300  |
| Q99394 | TRS33     | 1 | 1 | 5.2 NaN  | 3323800  |
